# Supplementary material
Source: PubMed Central journal article supplement (PMC6644688)
Supplement: ao8b01207_si_001.pdf [file ao8b01207_si_001.pdf]

## Supporting Information

### Chiral Pentacarboxycyclopentadiene-based Brønsted Acid Catalyzed Enantioselective Desymmetrization of *meso*-Epoxides by 2-Mercaptobenzothiazoles

Chao Yuan<sup>a</sup>, Jun Li<sup>a</sup>, and Pingfan Li<sup>a\*</sup>

<sup>a</sup> *Department of Organic Chemistry, Faculty of Science, Beijing University of  
Chemical Technology, Beijing 100029, China*

*\*E-mail: lipf@mail.buct.edu.cn*

#### Contents:

1. Experimental details of the condition optimization.....S2
2. NMR copies of all compounds..... S5
3. HPLC copies of products ..... S28

## 1. Experimental details of the condition optimization

**Table S1. Nucleophiles optimization<sup>a</sup>**

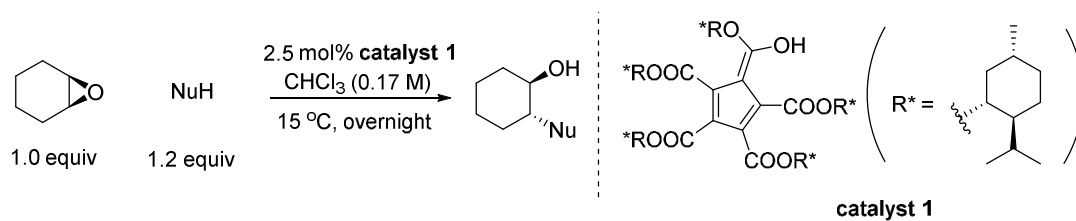

### NuH:

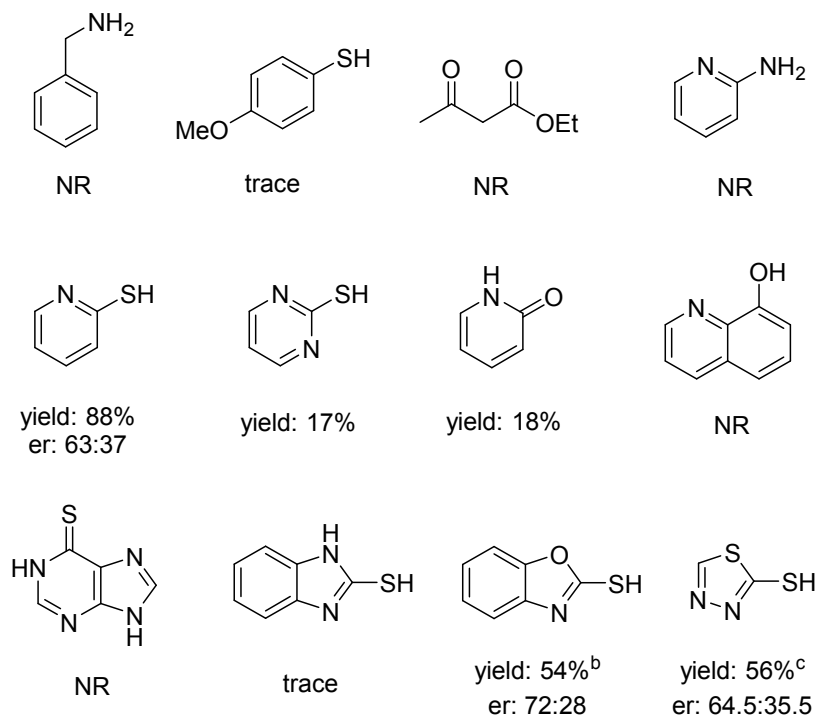

<sup>a</sup> Isolated yield. <sup>b</sup> Run at 22 °C. <sup>c</sup> 2.5 mol% catalyst 2 was used.

**Table S2. Temperature optimization<sup>a</sup>**

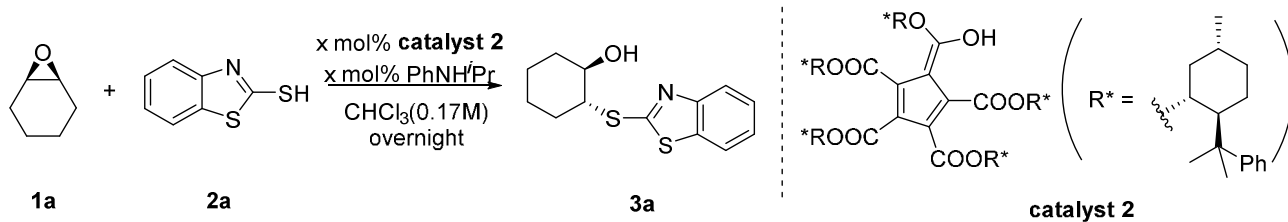

| entry          | temp (°C) | x   | yield (%) | er         |
|----------------|-----------|-----|-----------|------------|
| 1 <sup>b</sup> | 25        | 2.5 | 99        | 82.5: 17.5 |
| 2              | 0         | 2   | 57        | 69.5:30.5  |
| 3              | 10        | 2   | 88        | 85.5:14.5  |
| 4              | 15        | 2   | 93        | 86.5:13.5  |
| 5              | 20        | 2   | 94        | 86:14      |
| 6              | 25        | 2   | 99        | 85.5:14.5  |
| 7              | 15        | 5   | 99        | 89.5:10.5  |

<sup>a</sup> Isolated yield. <sup>b</sup>  $\text{PhNH}^i\text{Pr}$  was not added.

**Table S3. Epoxides and temperature optimization<sup>a</sup>**

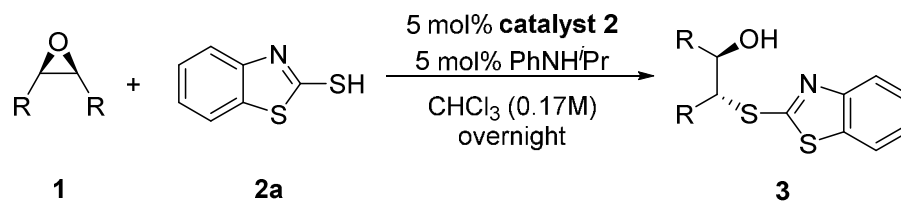

| entry             | epoxide | temp (°C) | yield (%)           | er                               |
|-------------------|---------|-----------|---------------------|----------------------------------|
|                   |         | 15        | trace               | /                                |
| 1                 |         | 30        | 54, 73 <sup>b</sup> | 80:20,<br>81.5:18.5 <sup>b</sup> |
|                   |         | 40        | 72                  | 74:26                            |
|                   |         | 55        | 98                  | 70.5:29.5                        |
|                   |         |           |                     |                                  |
| 2                 |         | 15        | 74 <sup>c</sup>     | 87:13 <sup>c</sup>               |
|                   |         | 30        | 94 <sup>b</sup>     | 84:16 <sup>b</sup>               |
| 3                 |         | 15        | 42                  | 74.5:25.5                        |
|                   |         | 30        | 84, 80 <sup>b</sup> | 85:15,<br>86.5:13.5 <sup>b</sup> |
|                   |         | 40        | 67                  | 82.5:17.5                        |
|                   |         | 55        | 58                  | 73.5:26.5                        |
| 4                 |         | 15        | 32                  | 65:35                            |
|                   |         | 30        | 93 <sup>b</sup>     | 81.5:18.5 <sup>b</sup>           |
|                   |         | 40        | 76                  | 77:23                            |
| 5                 |         | 15        | 7                   | 70:30                            |
|                   |         | 30        | 62 <sup>b, d</sup>  | 68:32 <sup>b, d</sup>            |
|                   |         | 55        | 62                  | 59:41                            |
| 6 <sup>e, f</sup> |         | 15        | 1                   | 74:26                            |
|                   |         | 30        | 49                  | 89:11                            |
|                   |         | 40        | 58                  | 81.5:18.5                        |
|                   |         | 55        | 53                  | 78:22                            |

<sup>a</sup> Isolated yield. <sup>b</sup> 10 mol % catalyst loading. <sup>c</sup> 15 mol % catalyst loading. <sup>d</sup> Reaction time: 24

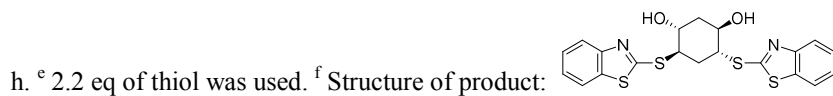

## 2. NMR copies of all compounds

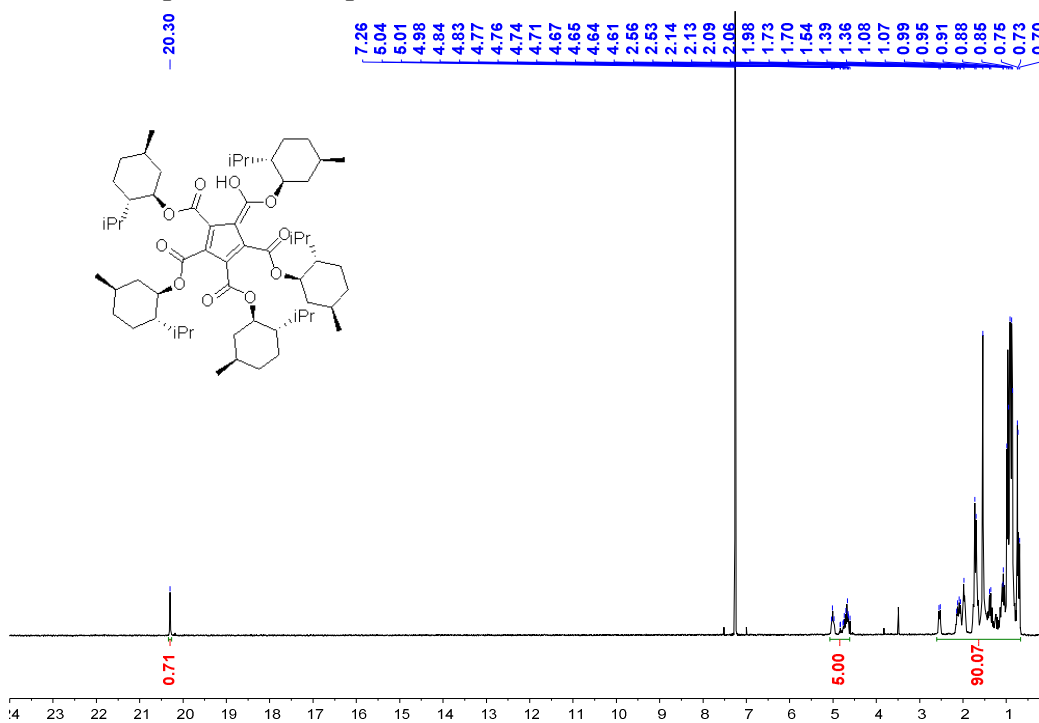

Figure S1. <sup>1</sup>H NMR spectrum of Catalyst 1 in CDCl<sub>3</sub>

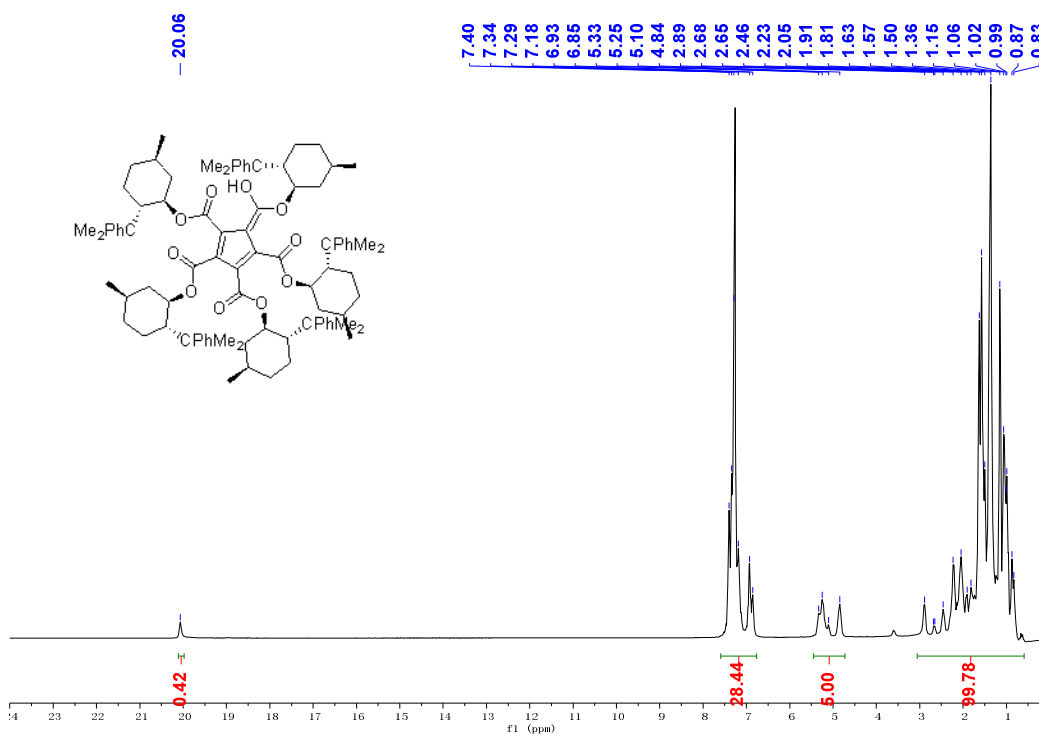

Figure S2. <sup>1</sup>H NMR spectrum of Catalyst 2 in CDCl<sub>3</sub>

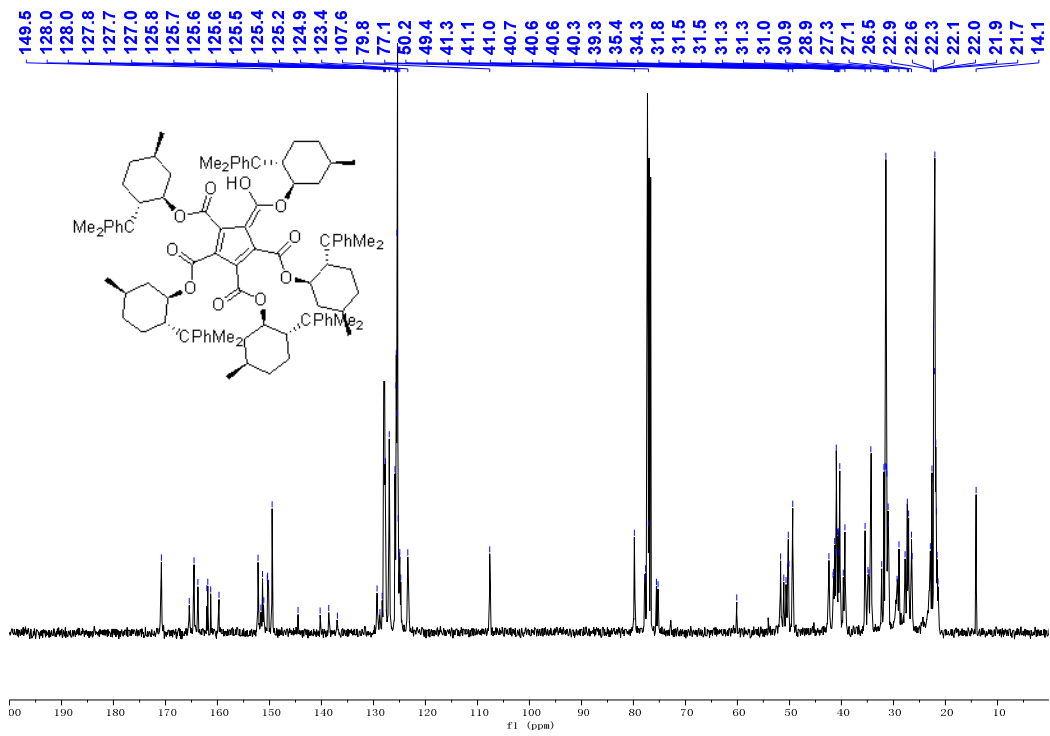

**Figure S3.**  $^{13}\text{C}$  NMR spectrum of **Catalyst 2** in  $\text{CDCl}_3$

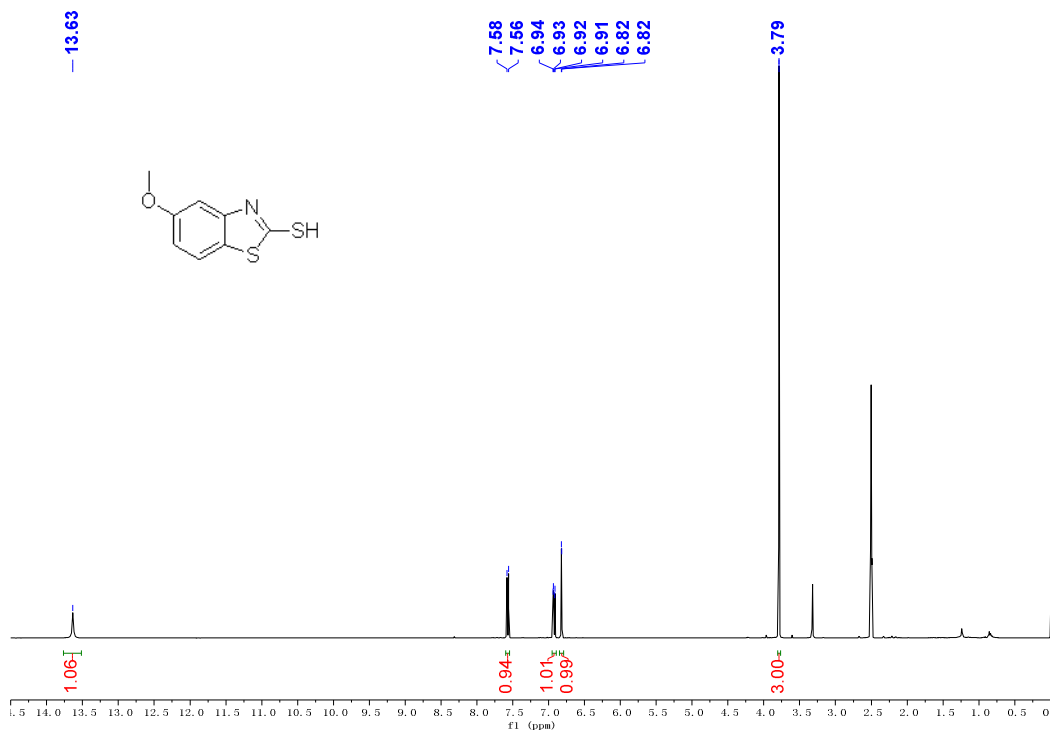

Figure S4. <sup>1</sup>H NMR spectrum of 2b in DMSO-*d*<sub>6</sub>

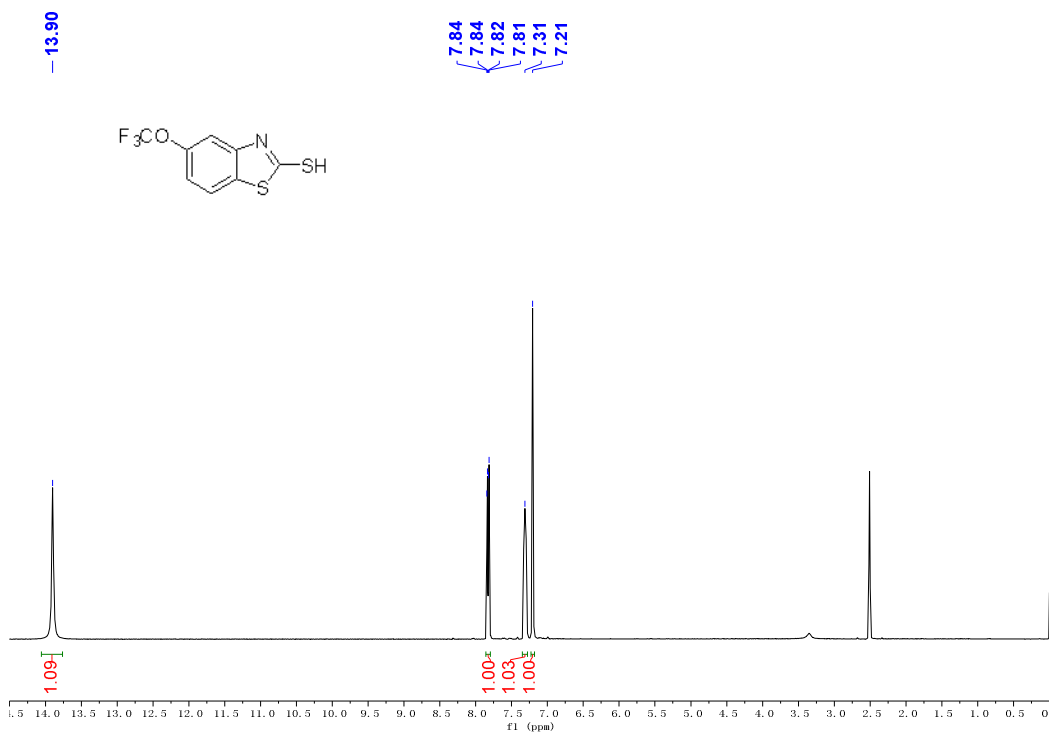

Figure S5. <sup>1</sup>H NMR spectrum of 2c in DMSO-*d*<sub>6</sub>

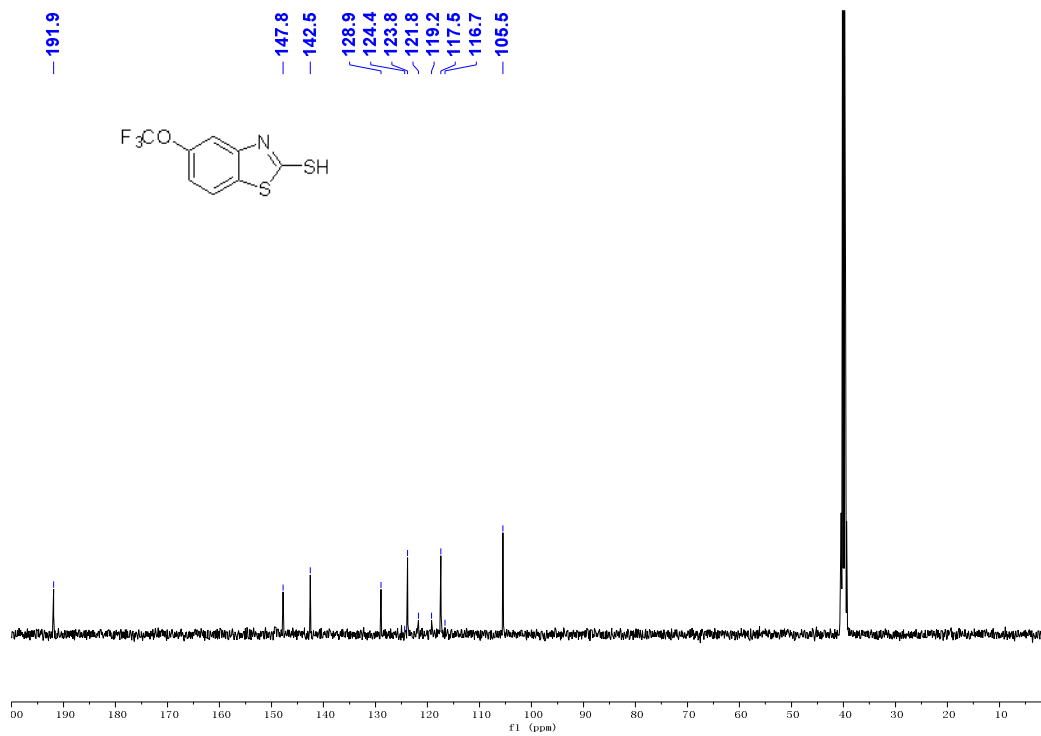

Figure S6. <sup>13</sup>C NMR spectrum of **2c** in DMSO-*d*<sub>6</sub>

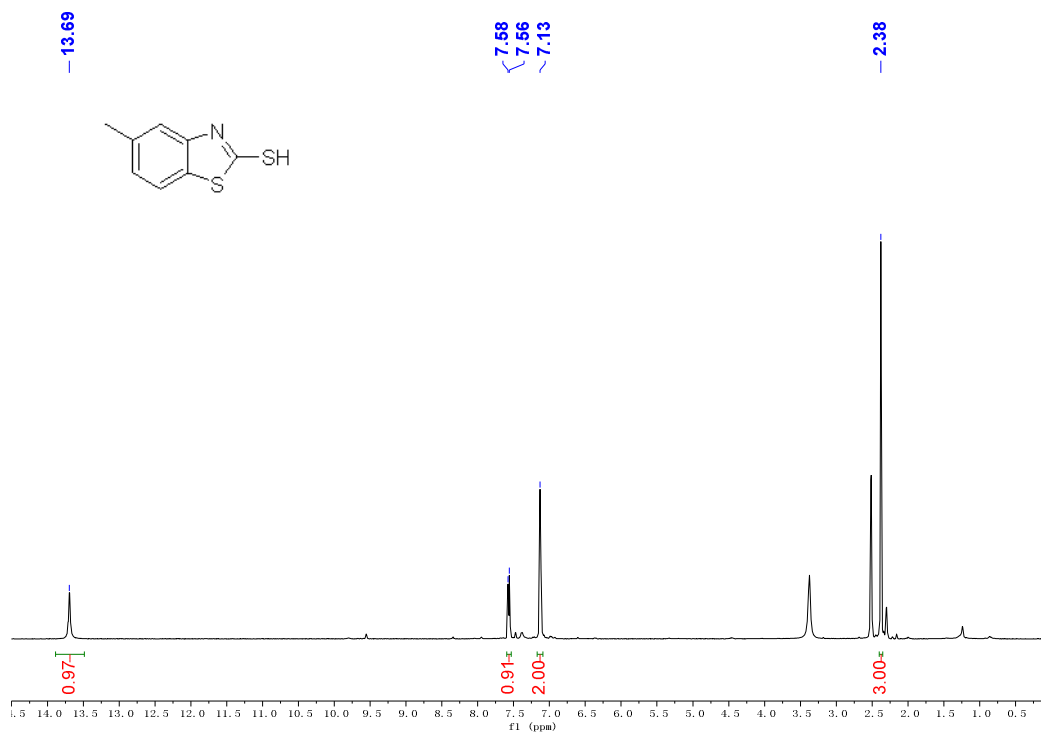

Figure S7. <sup>1</sup>H NMR spectrum of **2d** in DMSO-*d*<sub>6</sub>



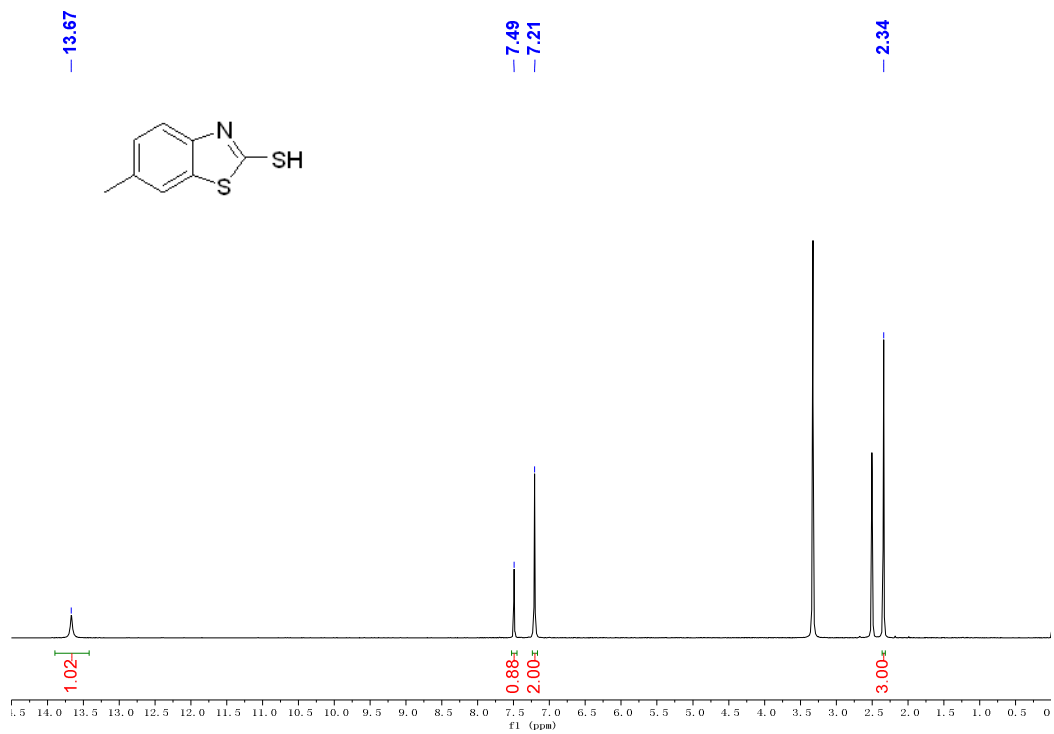

Figure S8. <sup>1</sup>H NMR spectrum of 2e in DMSO-*d*<sub>6</sub>

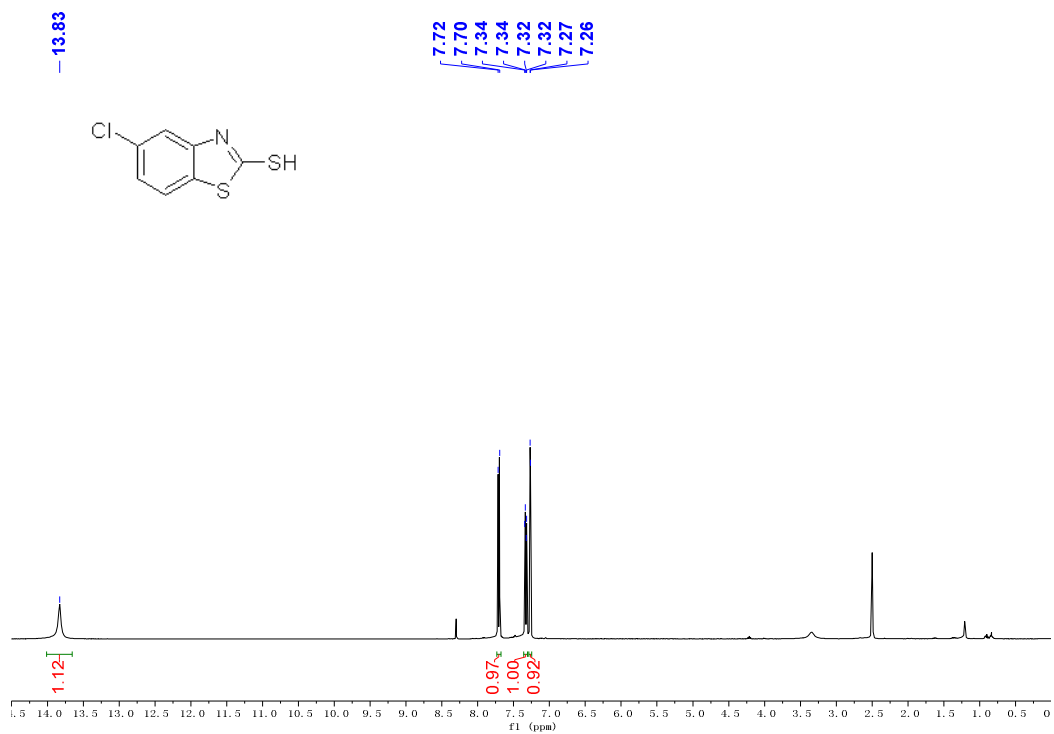

Figure S9. <sup>1</sup>H NMR spectrum of 2f in DMSO-*d*<sub>6</sub>

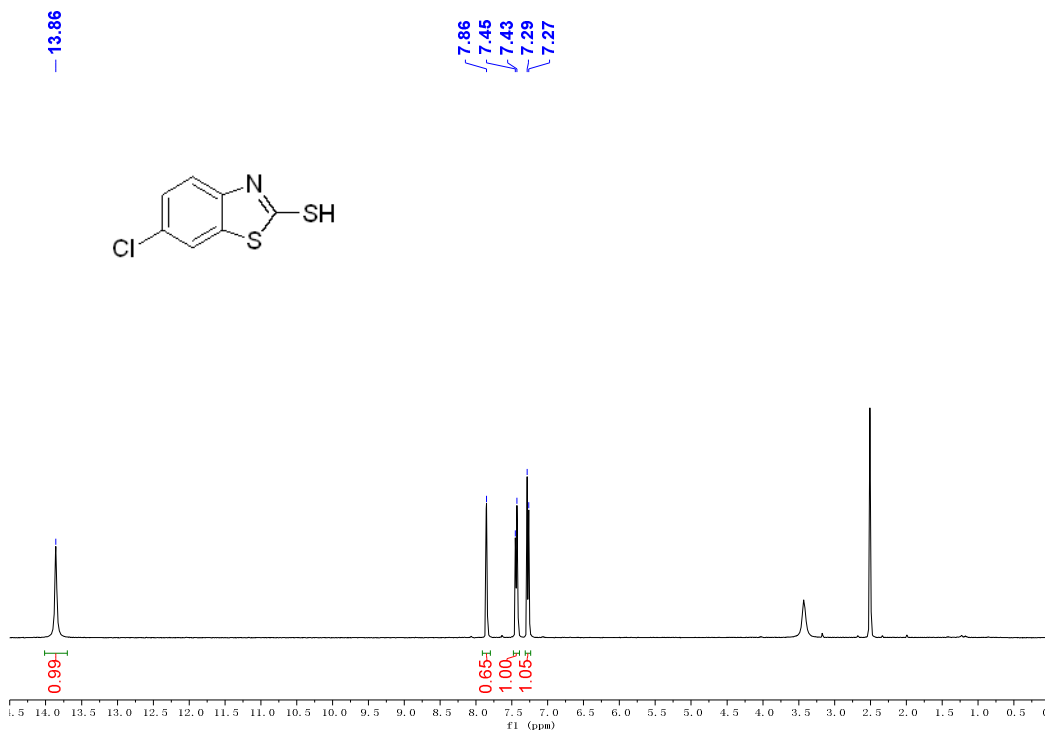

**Figure S10.**  $^1\text{H}$  NMR spectrum of **2g** in  $\text{DMSO-}d_6$

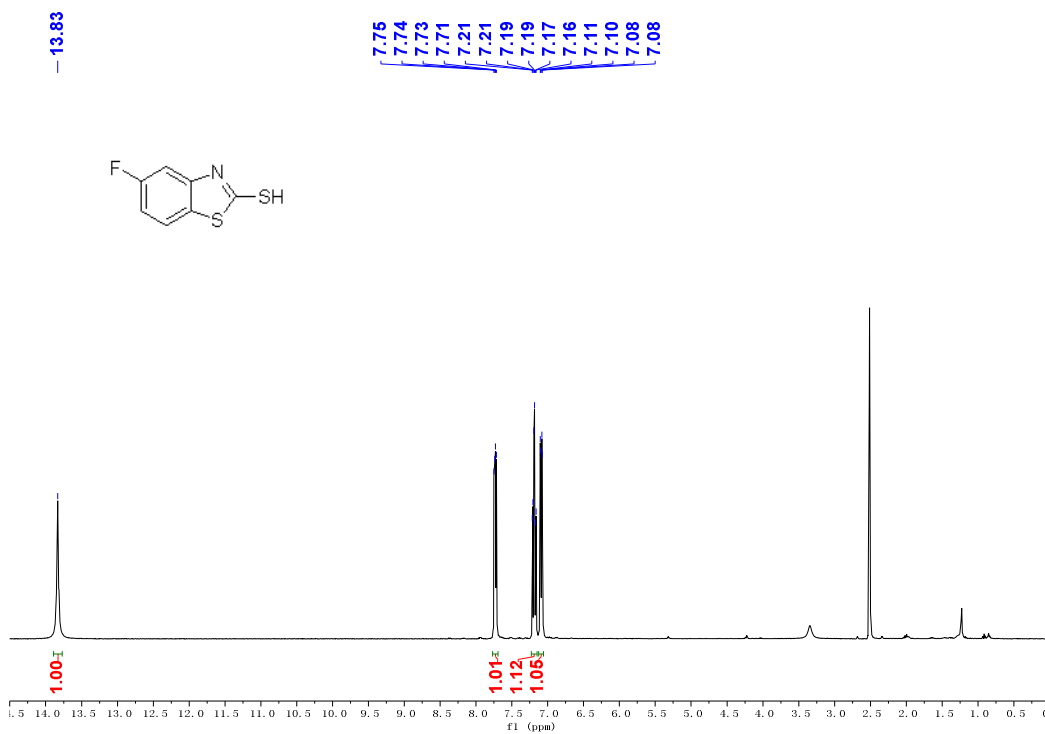

**Figure S11.**  $^1\text{H}$  NMR spectrum of **2h** in  $\text{DMSO-}d_6$

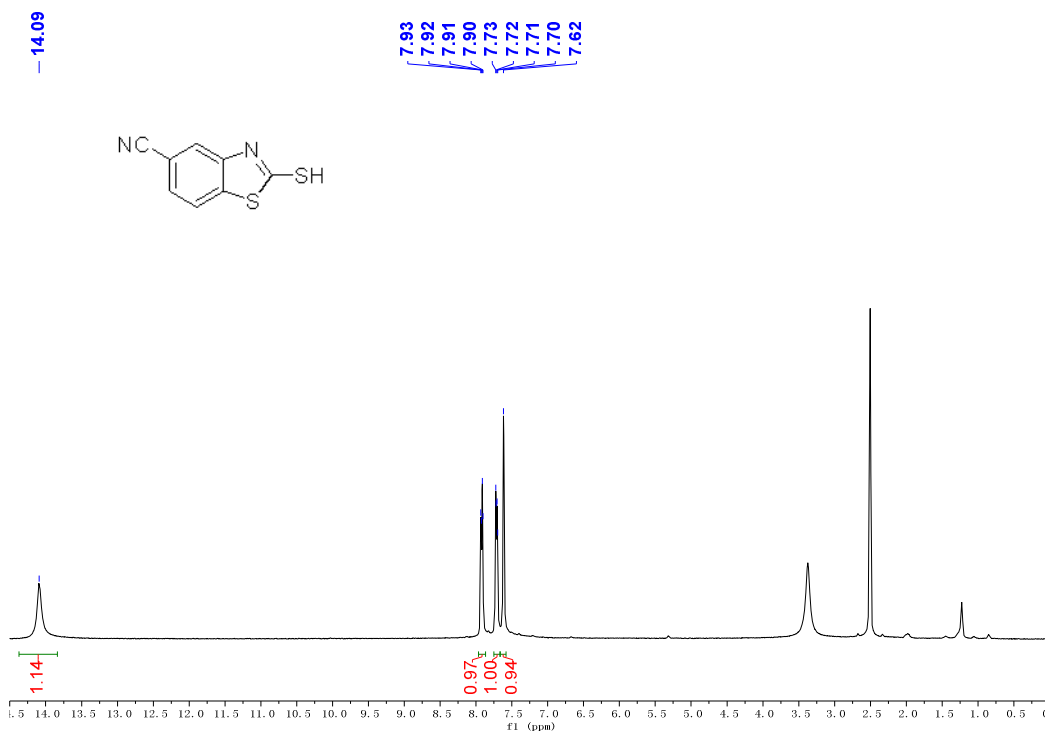

**Figure S12.**  $^1\text{H}$  NMR spectrum of **2i** in  $\text{DMSO-}d_6$

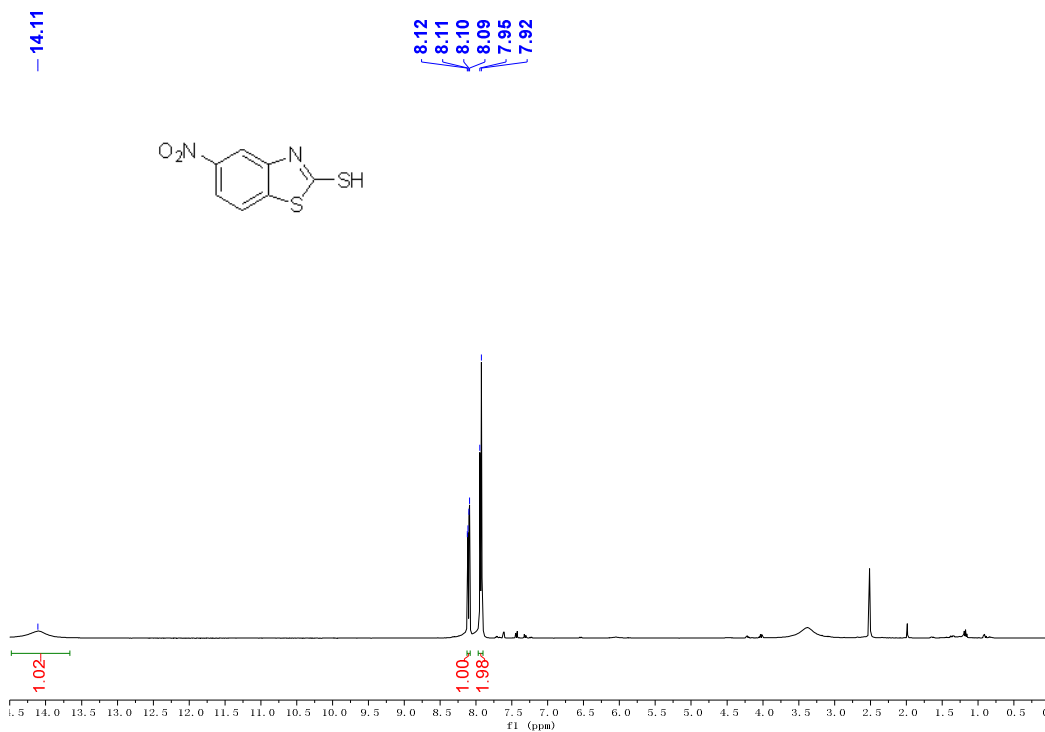

**Figure S13.**  $^1\text{H}$  NMR spectrum of **2j** in  $\text{DMSO-}d_6$

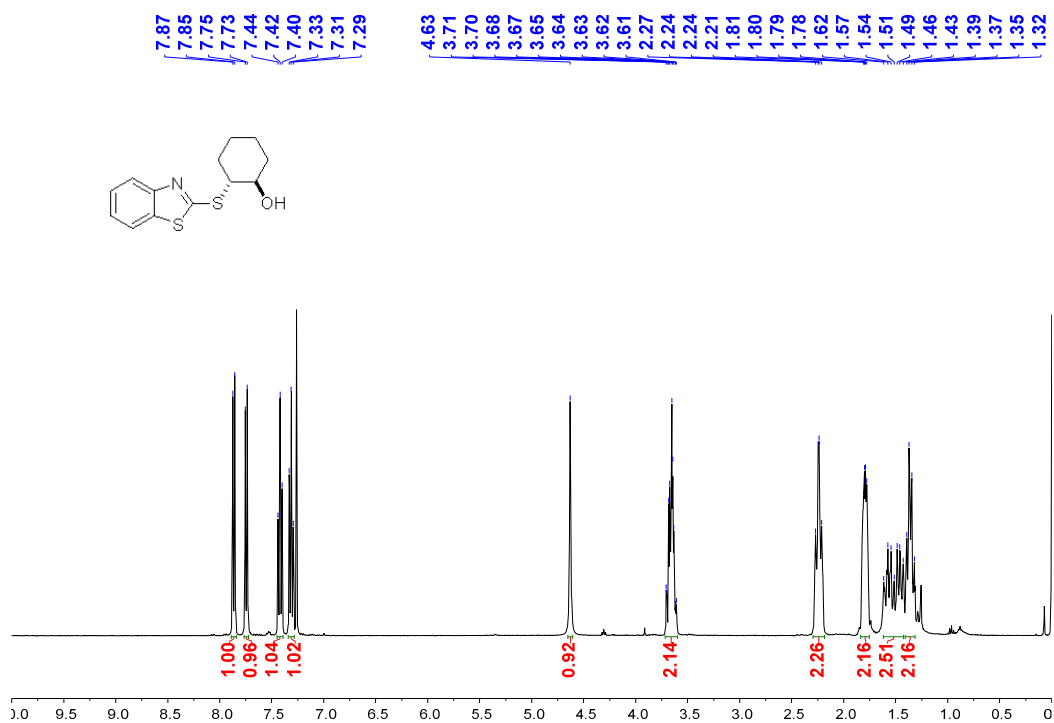

Figure S14.  $^1\text{H}$  NMR spectrum of **3a** in  $\text{CDCl}_3$

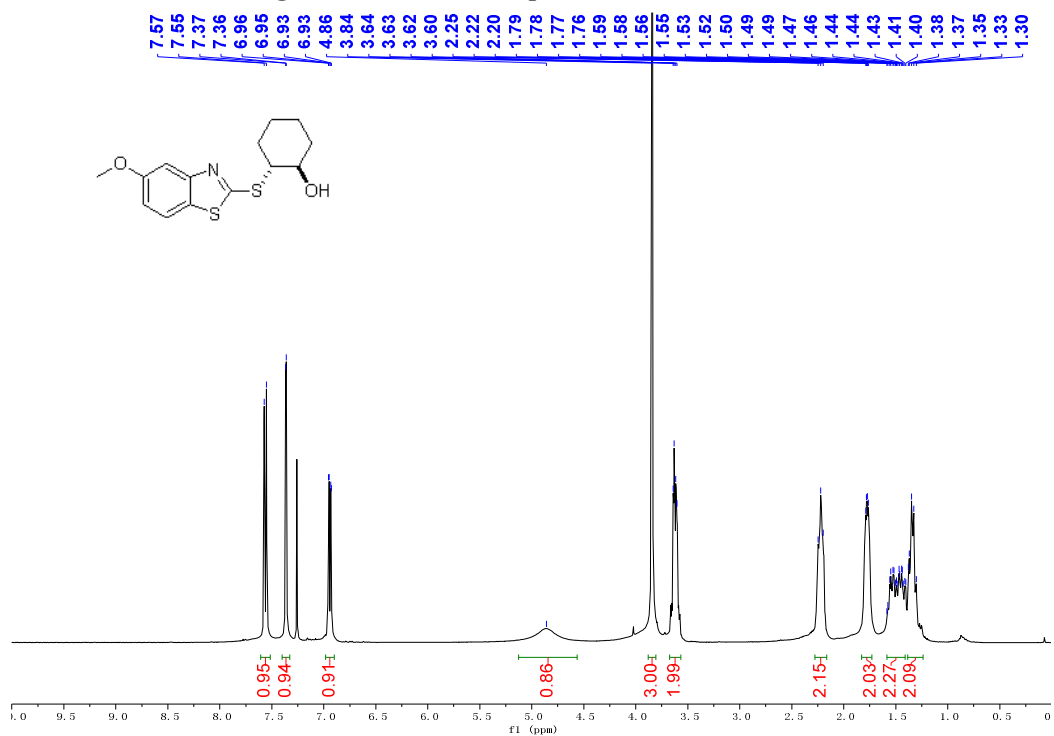

Figure S15.  $^1\text{H}$  NMR spectrum of **3b** in  $\text{CDCl}_3$

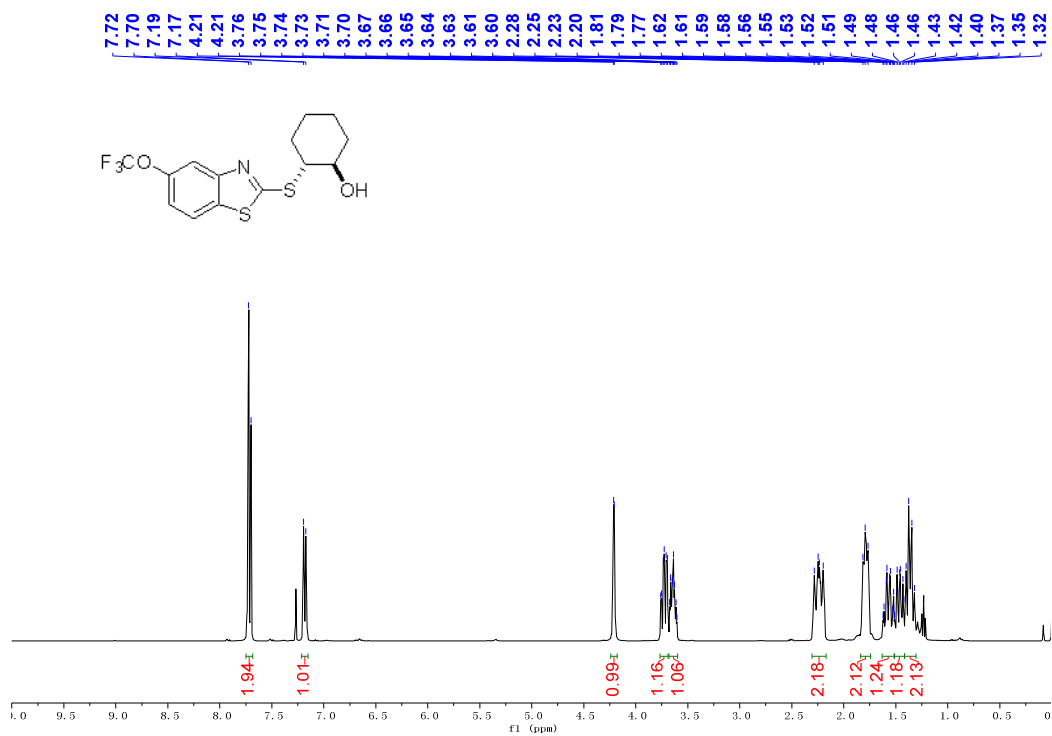

Figure S16. <sup>1</sup>H NMR spectrum of 3c in CDCl<sub>3</sub>

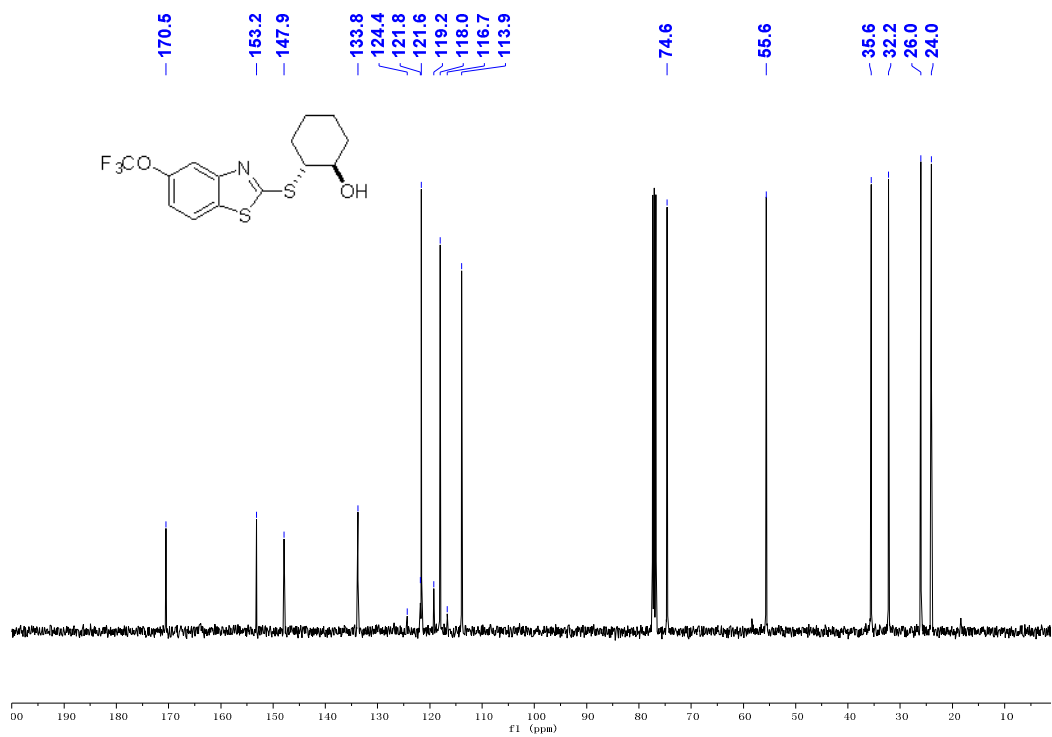

Figure S17. <sup>13</sup>C NMR spectrum of 3c in CDCl<sub>3</sub>

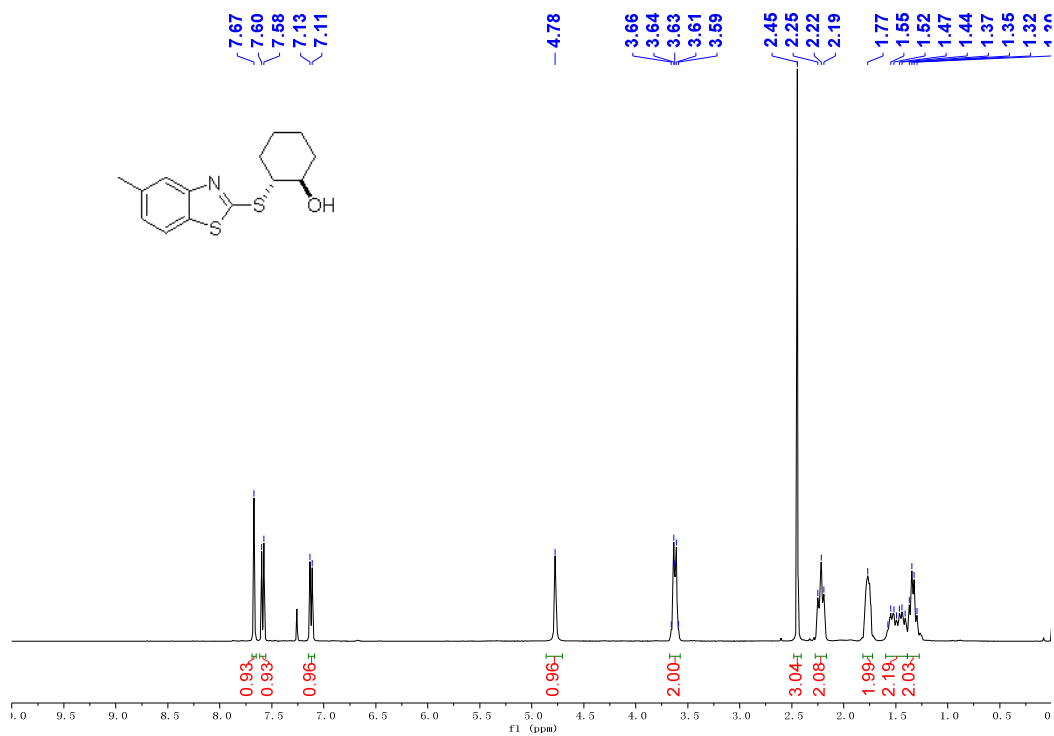

Figure S18. <sup>1</sup>H NMR spectrum of 3d in CDCl<sub>3</sub>

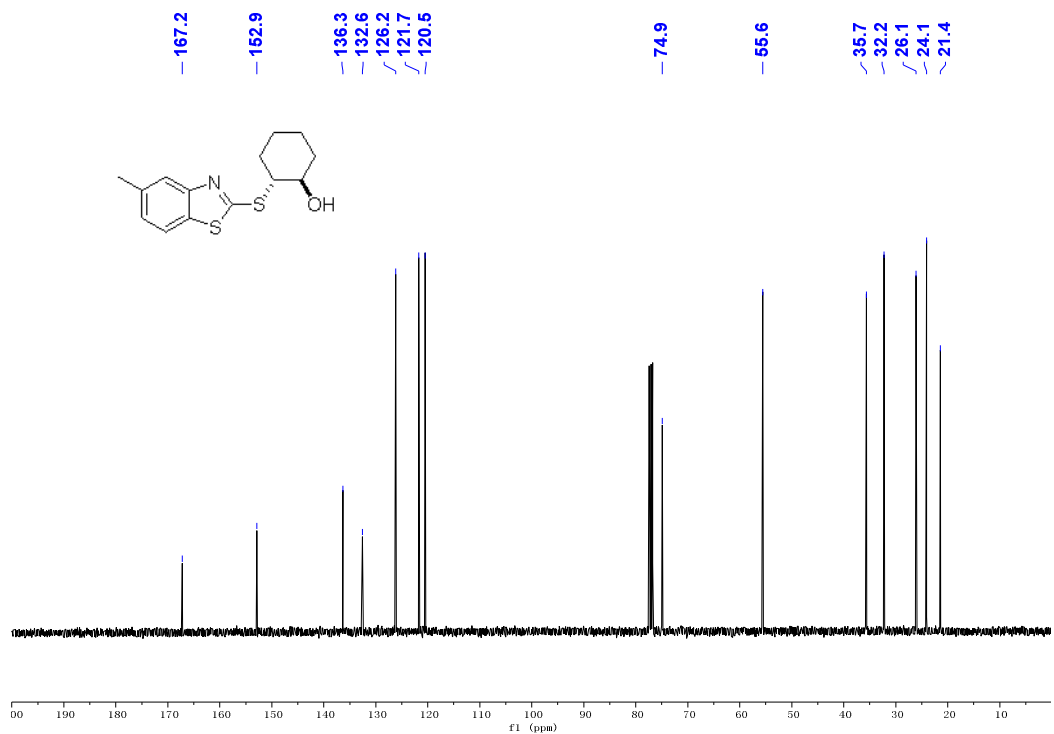

Figure S19. <sup>13</sup>C NMR spectrum of 3d in CDCl<sub>3</sub>

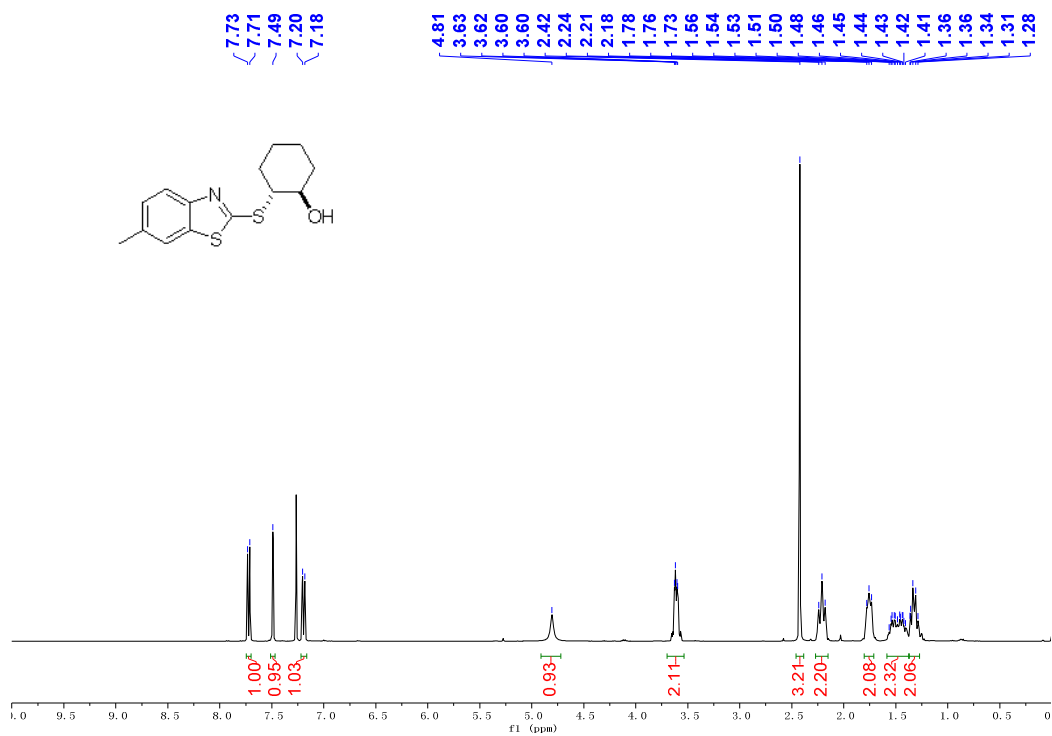

**Figure S20.**  $^1\text{H}$  NMR spectrum of **3e** in  $\text{CDCl}_3$

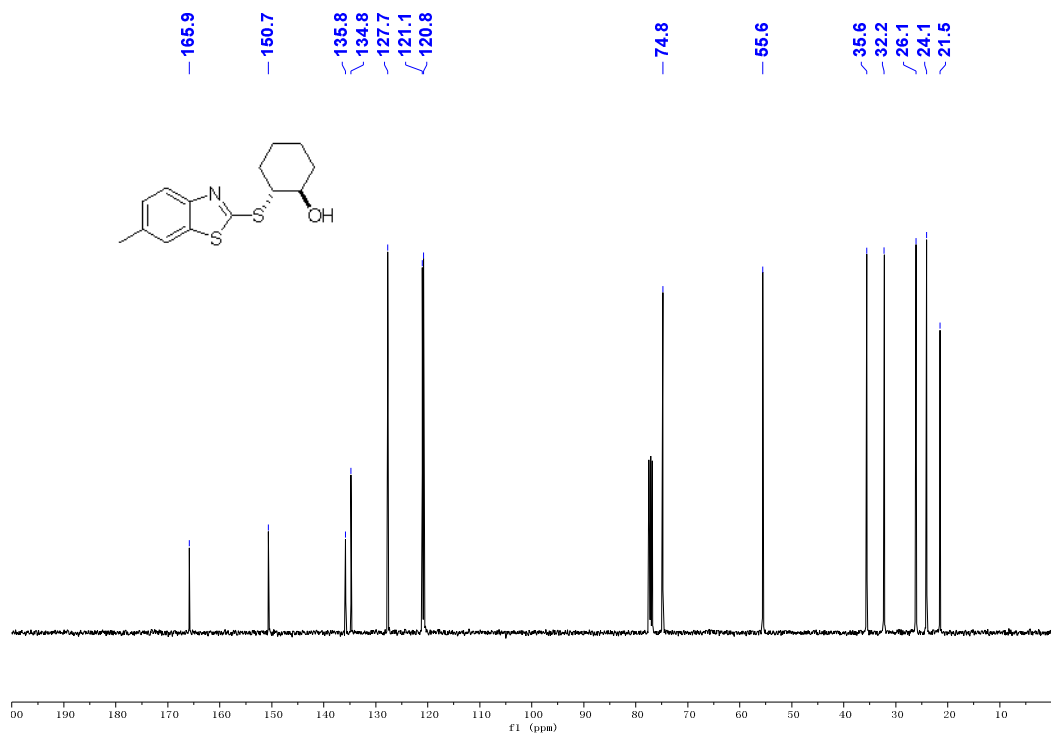

**Figure S21.**  $^{13}\text{C}$  NMR spectrum of **3e** in  $\text{CDCl}_3$

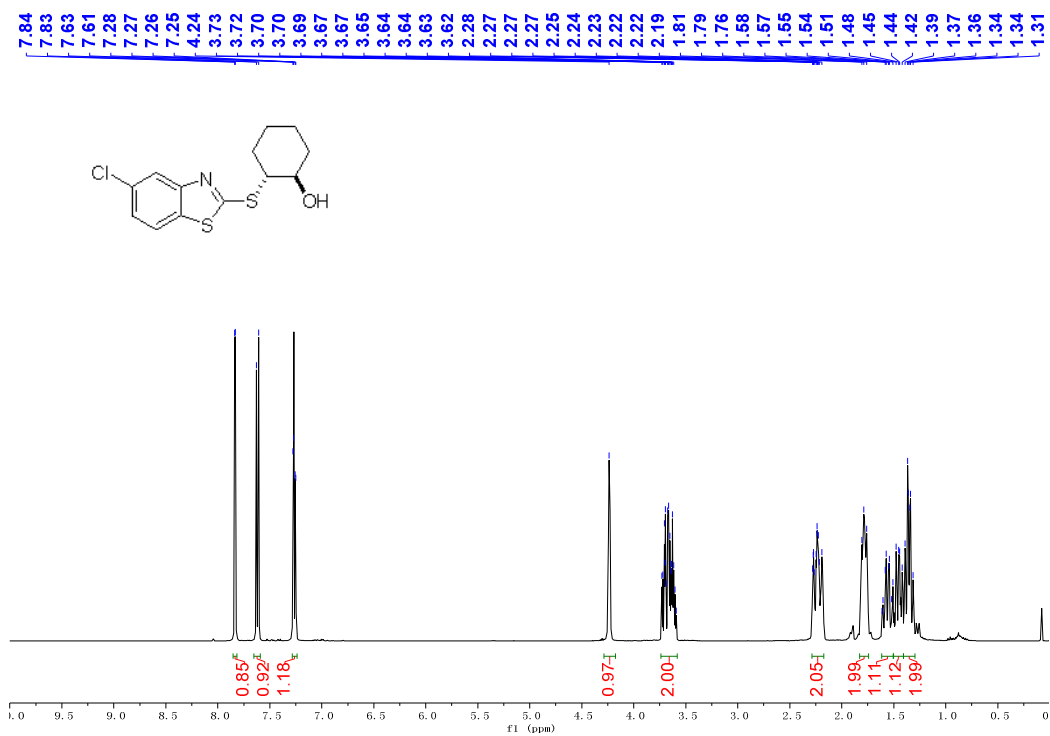

Figure S22. <sup>1</sup>H NMR spectrum of 3f in CDCl<sub>3</sub>



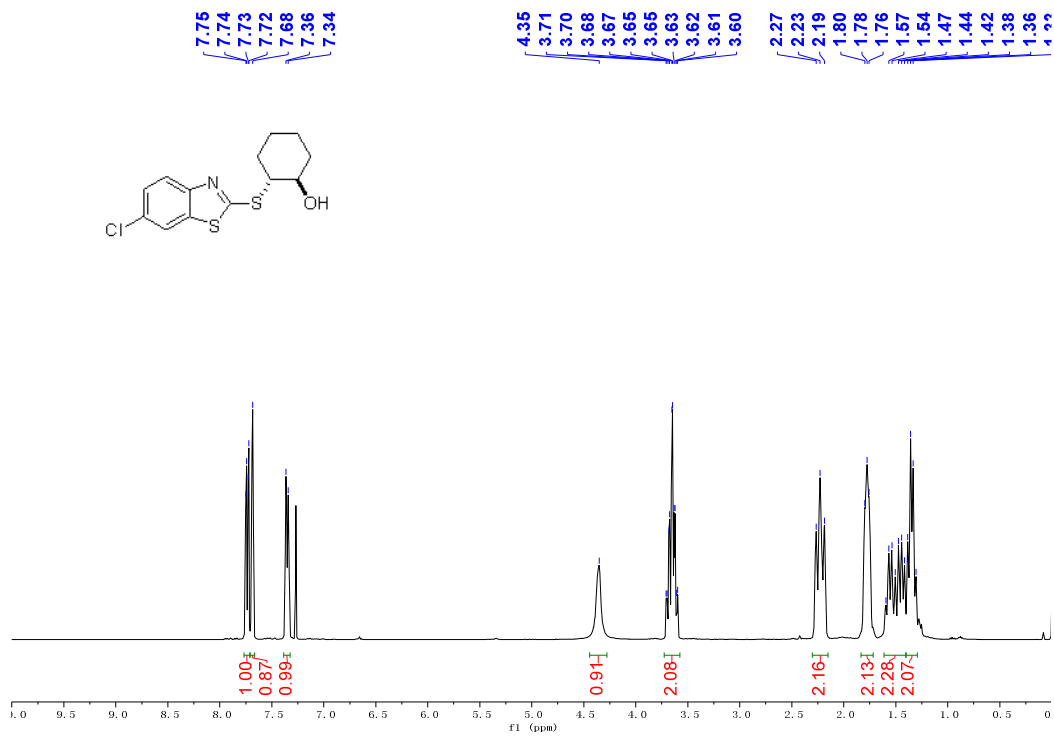

Figure S23. <sup>1</sup>H NMR spectrum of **3g** in CDCl<sub>3</sub>

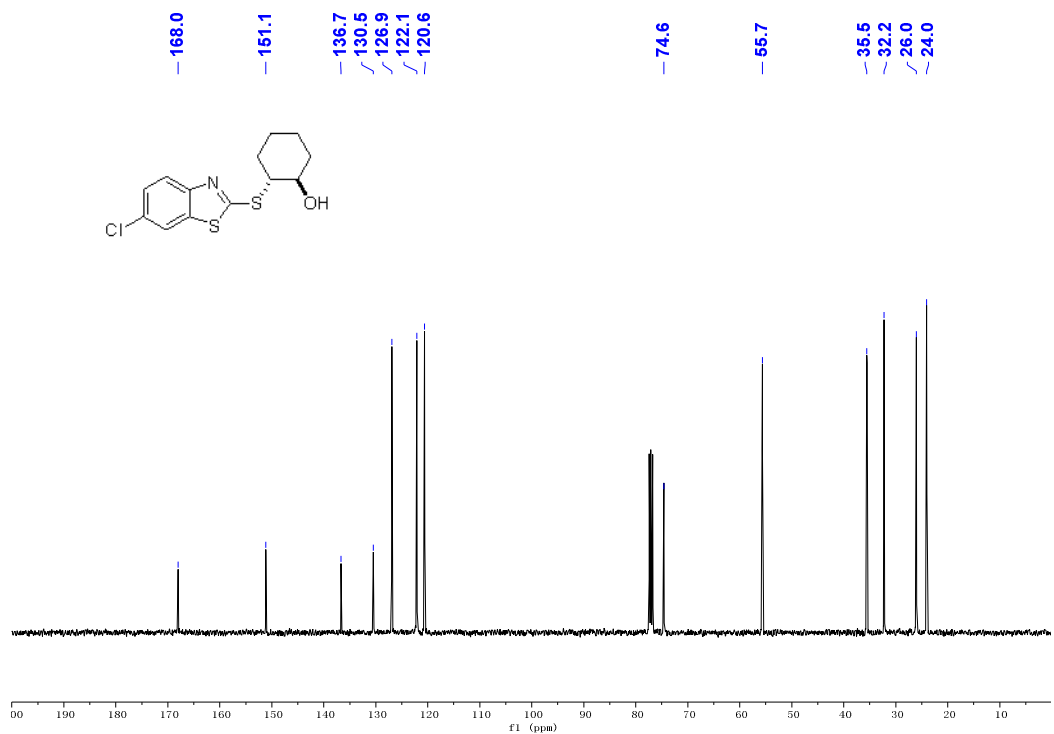

Figure S24. <sup>13</sup>C NMR spectrum of **3g** in CDCl<sub>3</sub>

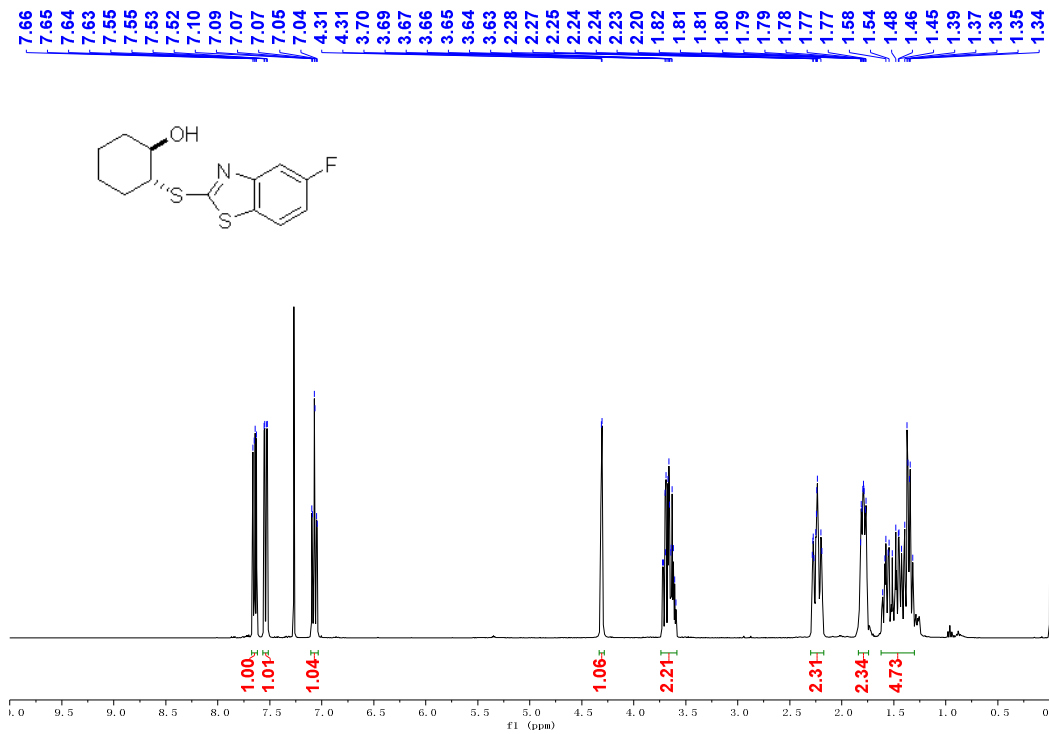

Figure S25. <sup>1</sup>H NMR spectrum of 3h in CDCl<sub>3</sub>

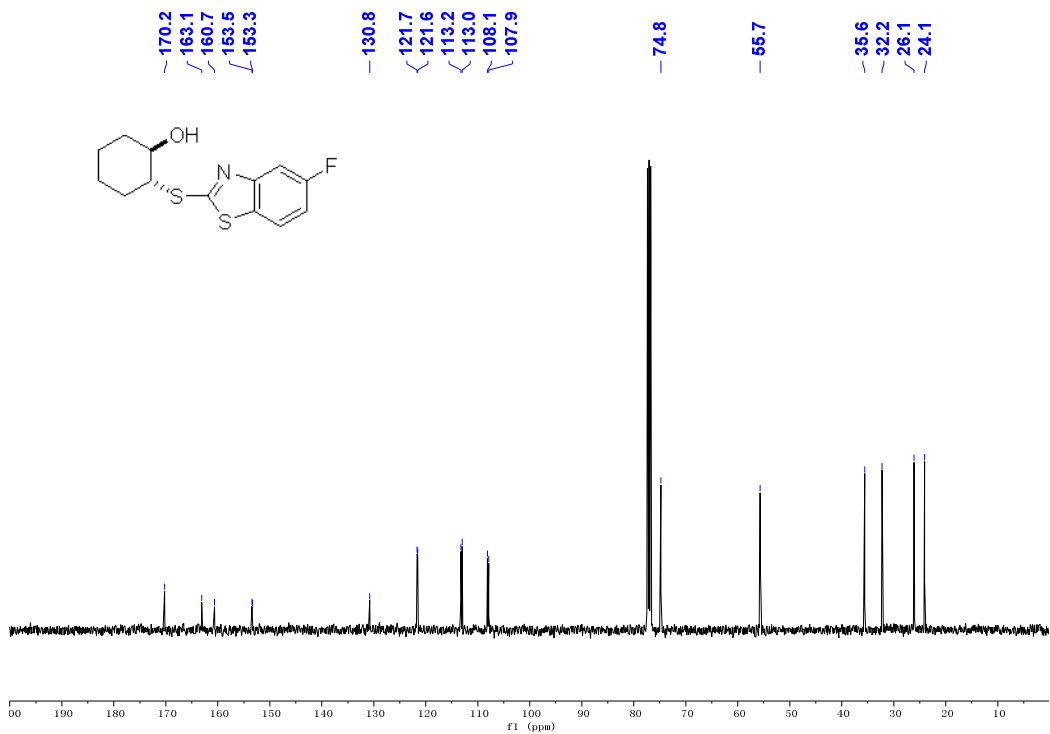

Figure S26. <sup>13</sup>C NMR spectrum of 3h in CDCl<sub>3</sub>

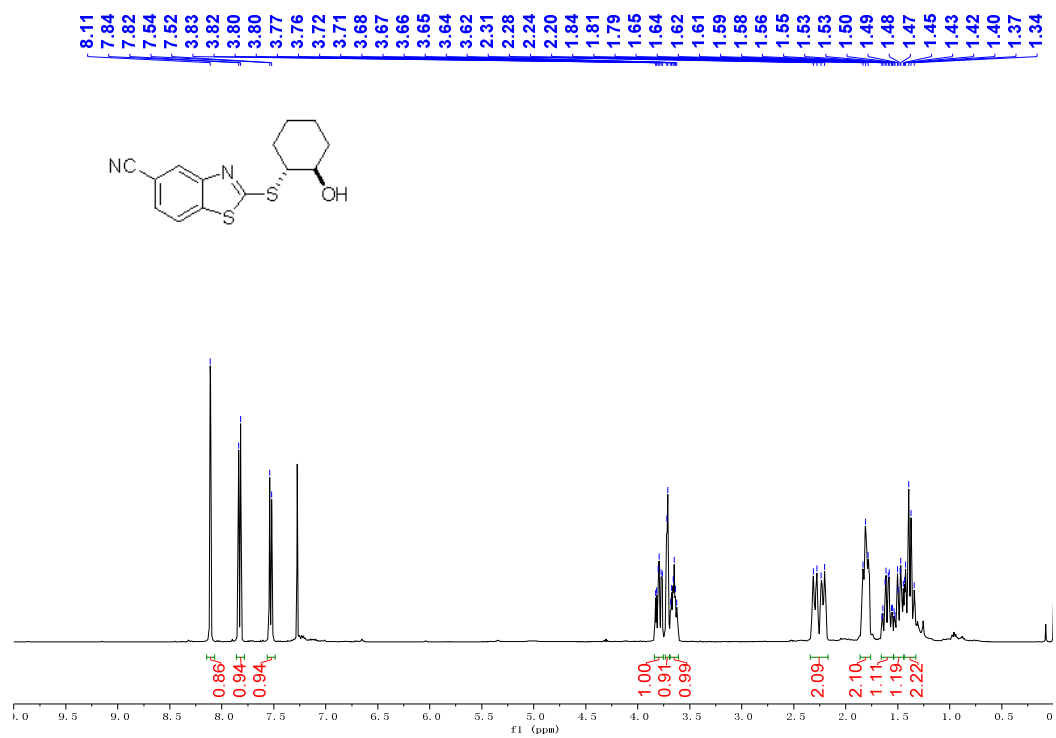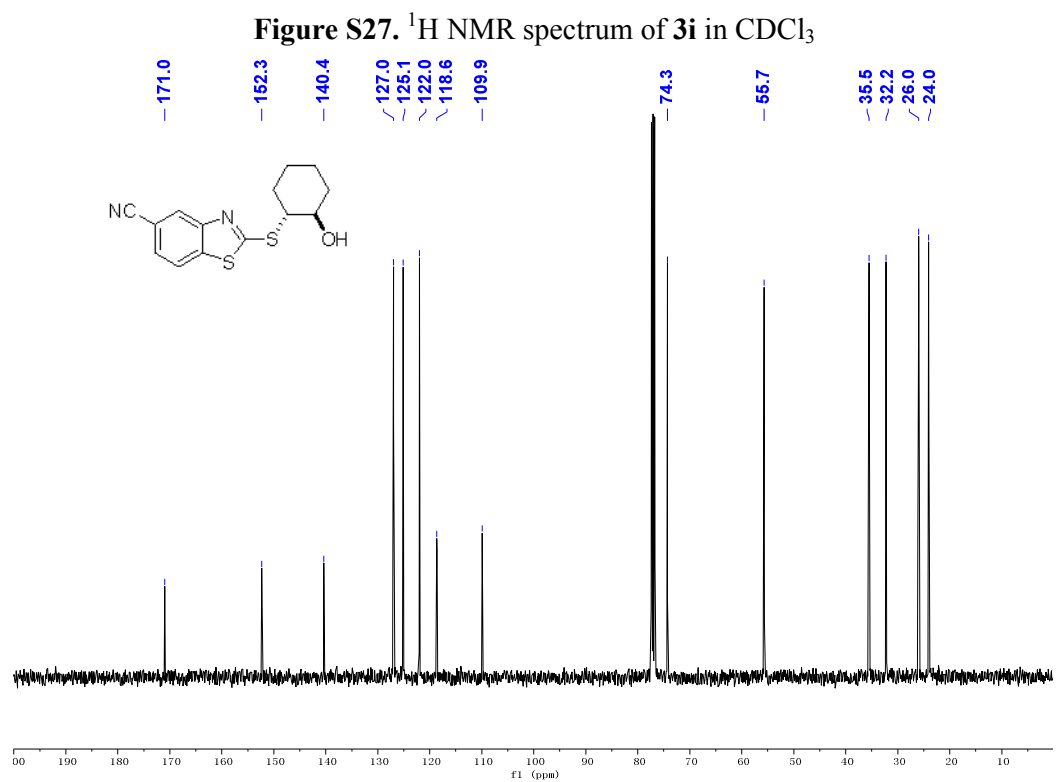

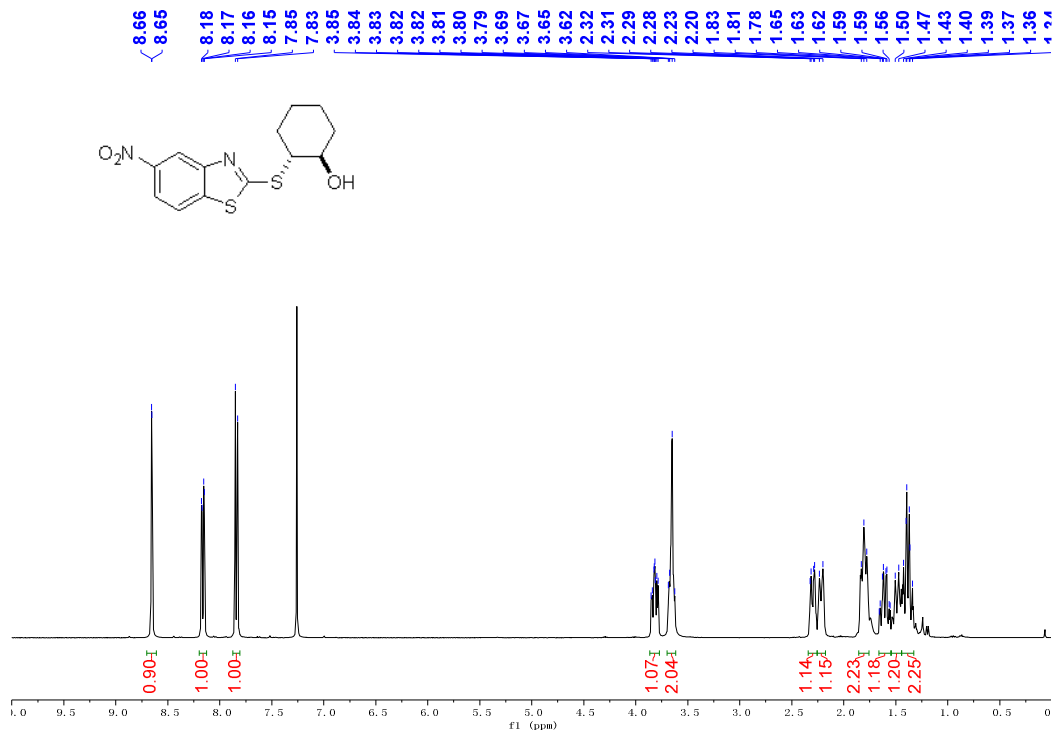

Figure S29. <sup>1</sup>H NMR spectrum of 3j in CDCl<sub>3</sub>

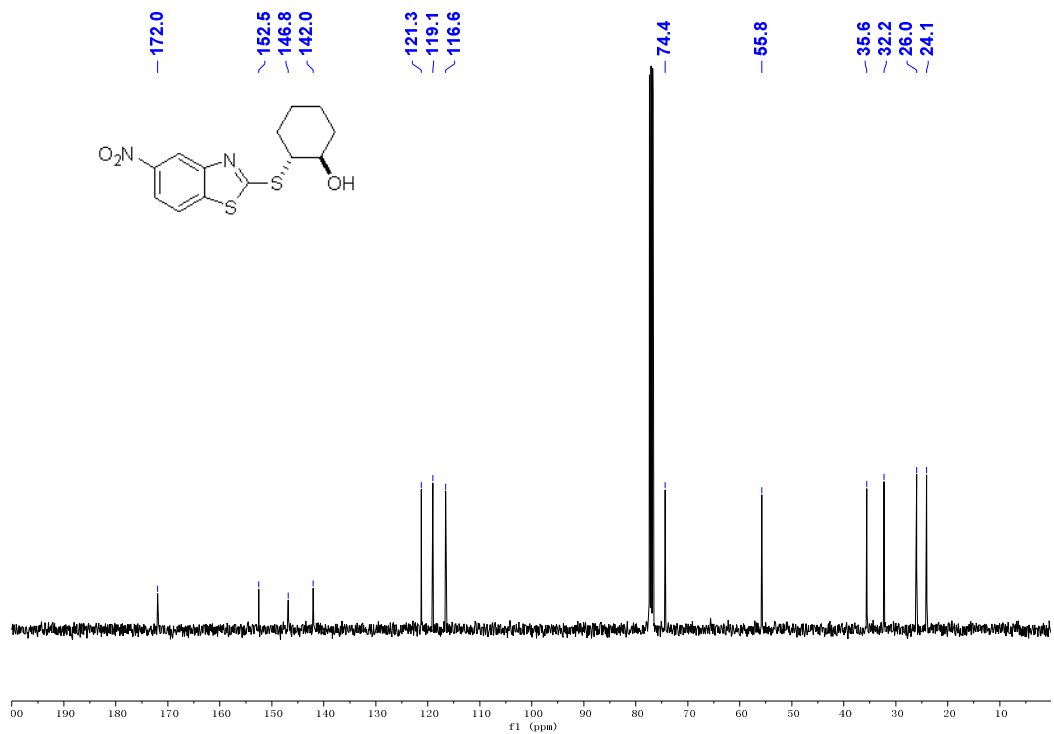

Figure S30. <sup>13</sup>C NMR spectrum of 3j in CDCl<sub>3</sub>

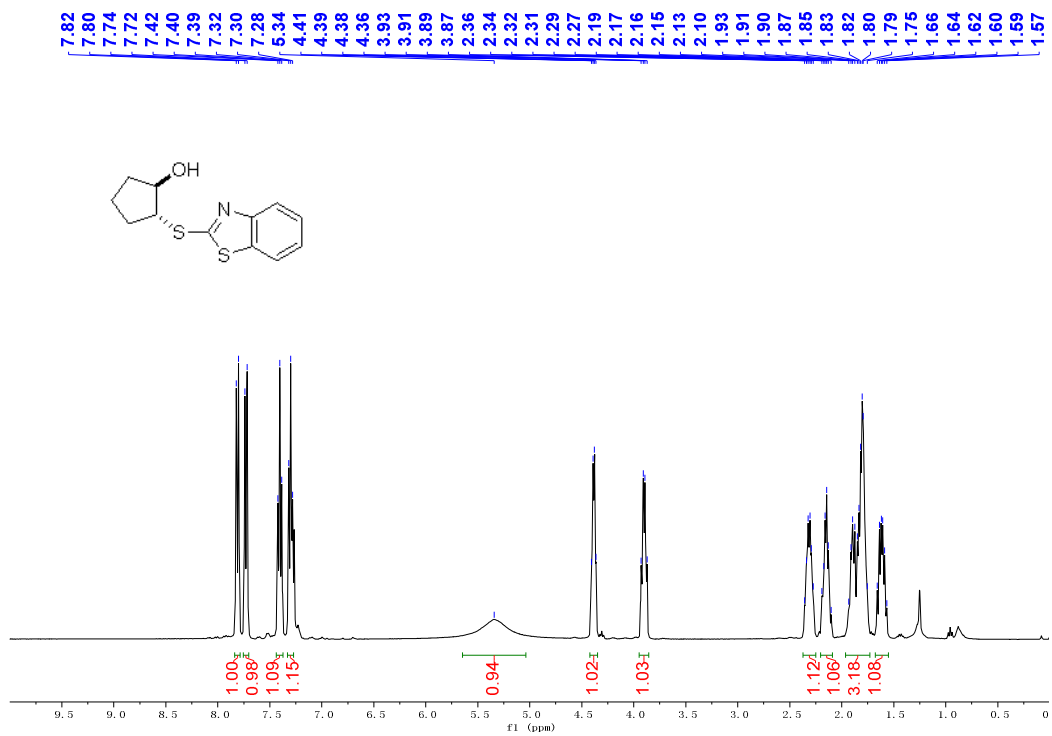

Figure S31. <sup>1</sup>H NMR spectrum of 3k in CDCl<sub>3</sub>

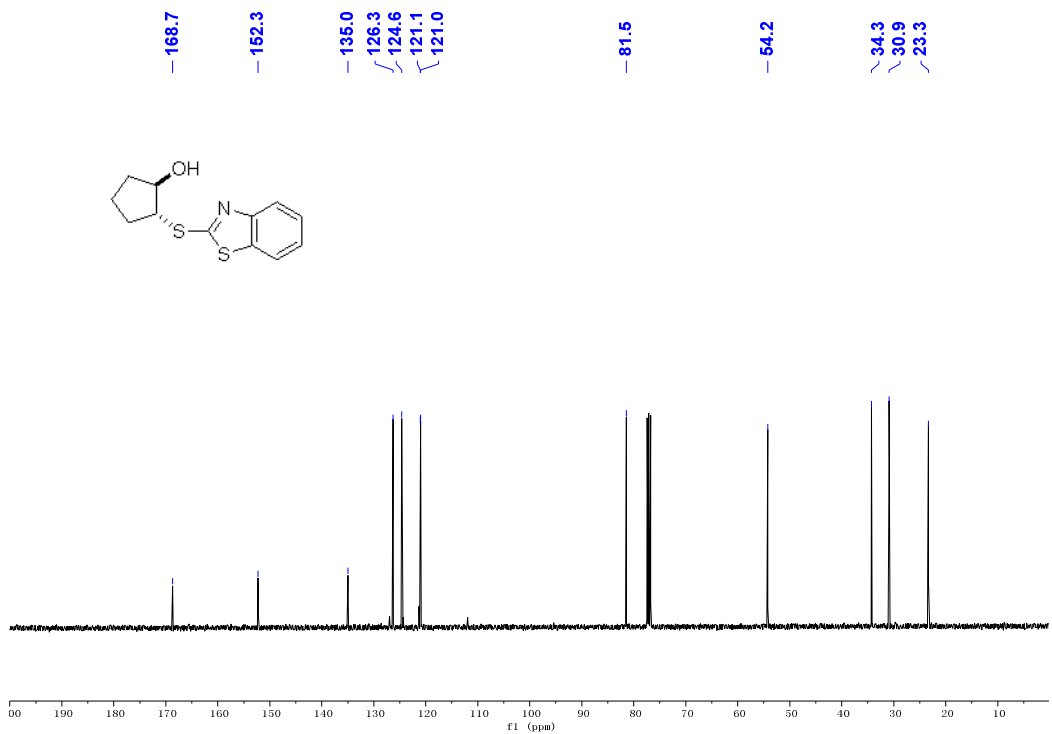

Figure S32. <sup>13</sup>C NMR spectrum of 3k in CDCl<sub>3</sub>

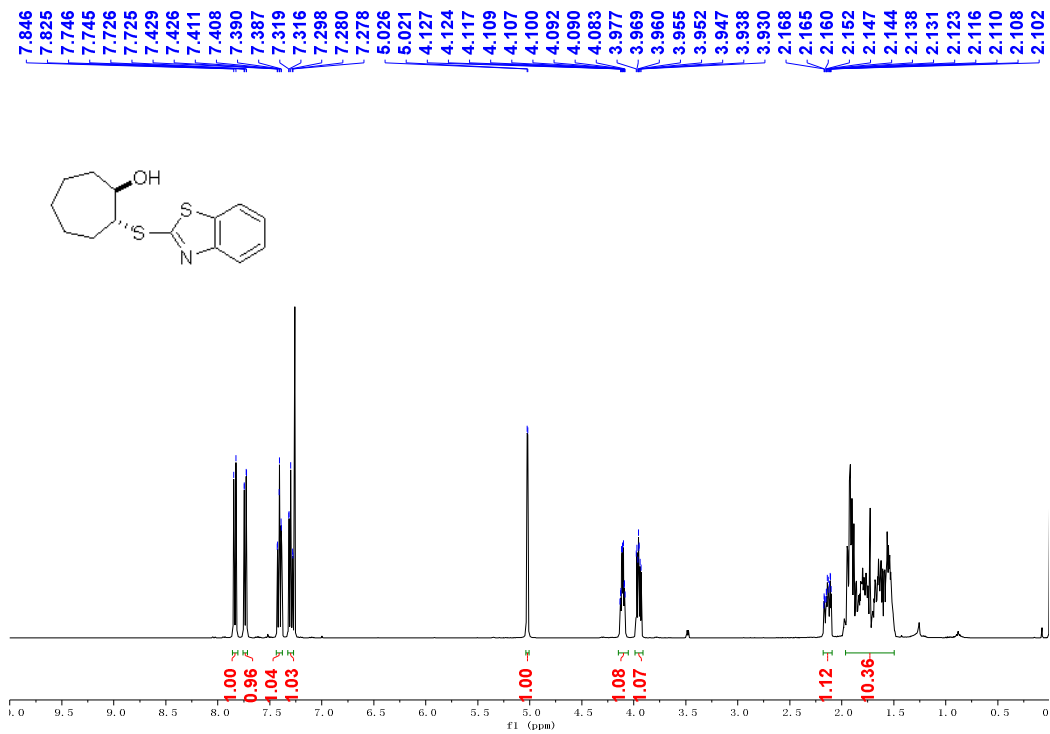

Figure S33.  $^1\text{H}$  NMR spectrum of **31** in  $\text{CDCl}_3$

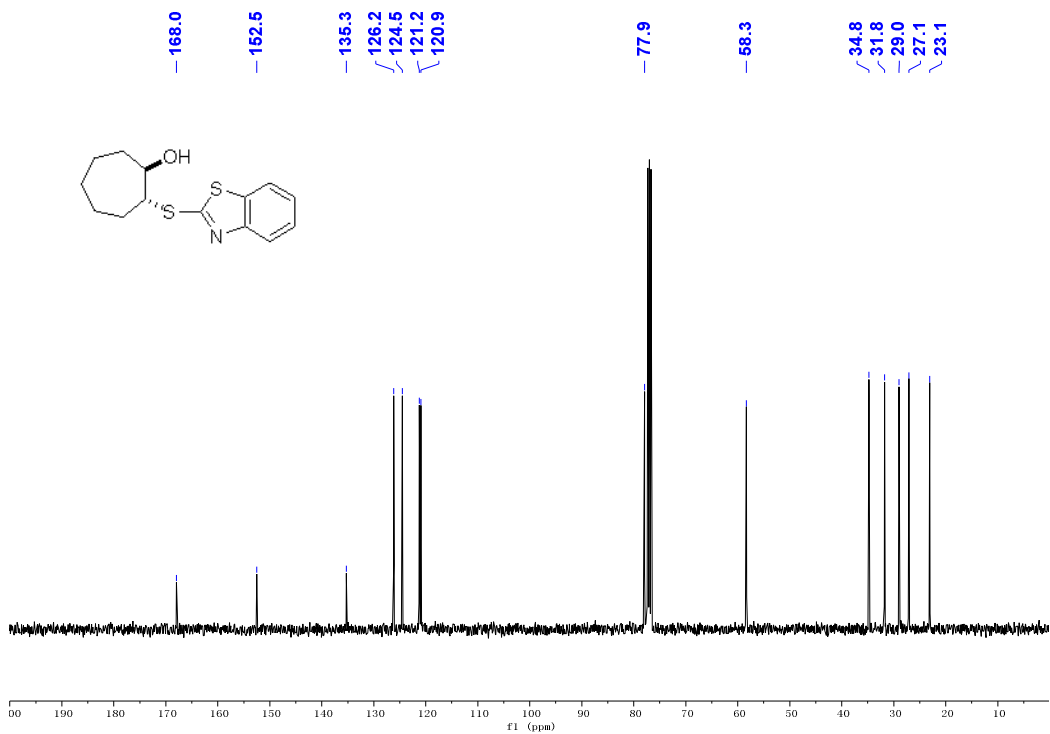

Figure S34.  $^{13}\text{C}$  NMR spectrum of **31** in  $\text{CDCl}_3$

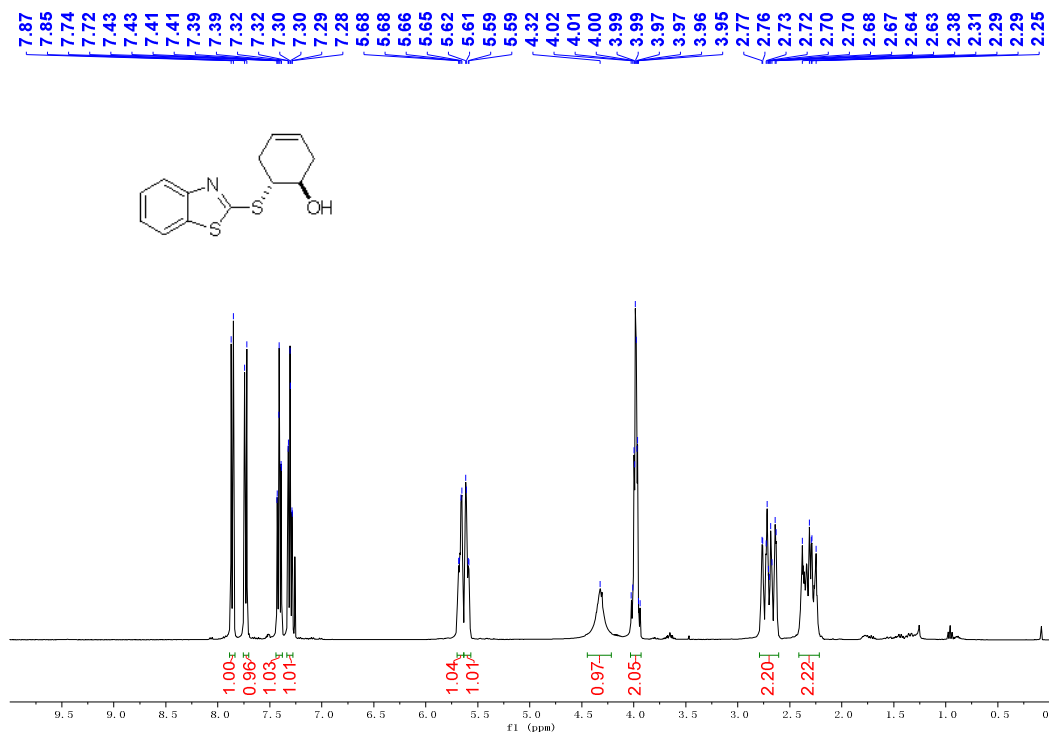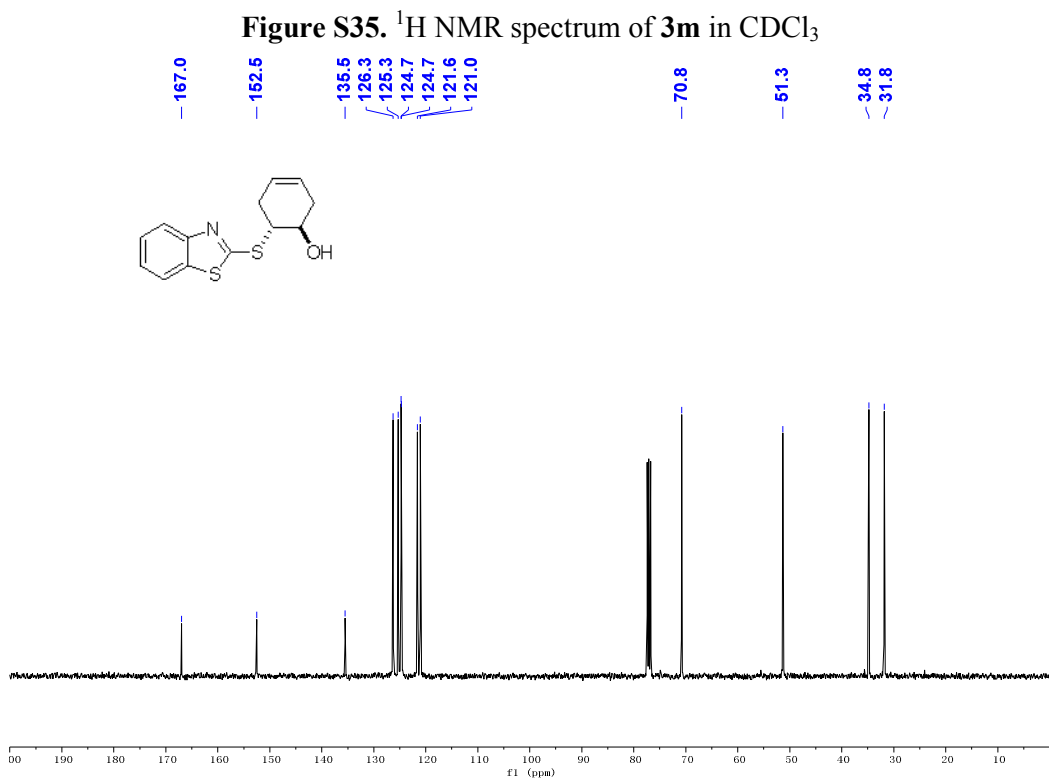

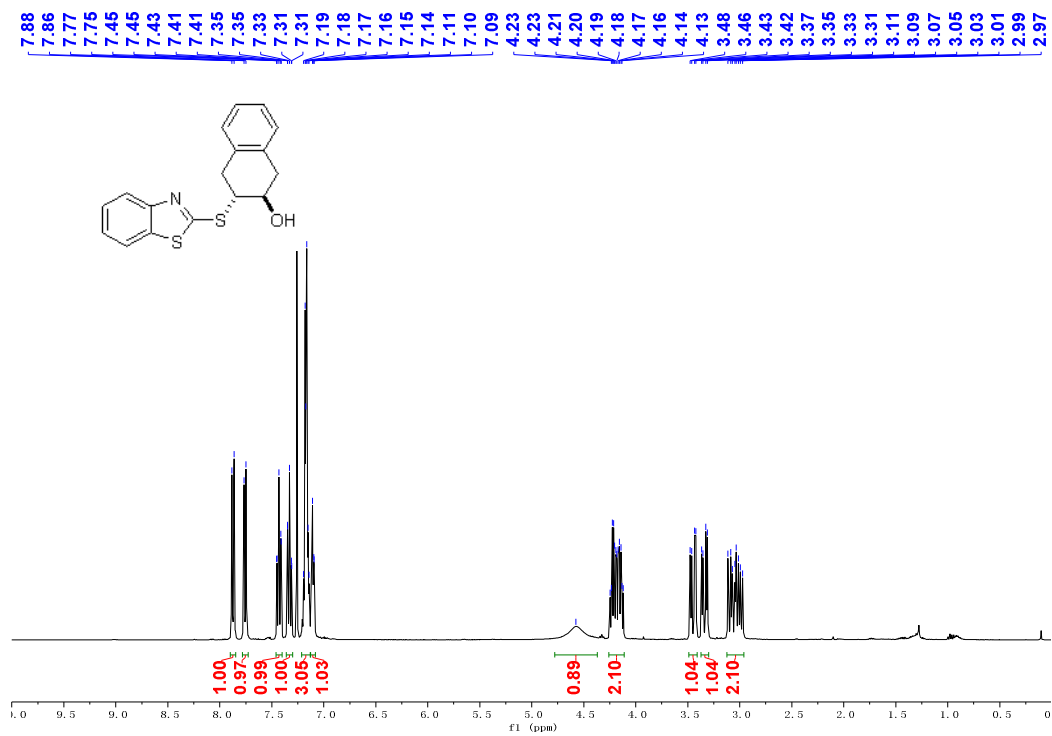

Figure S37. <sup>1</sup>H NMR spectrum of 3n in CDCl<sub>3</sub>

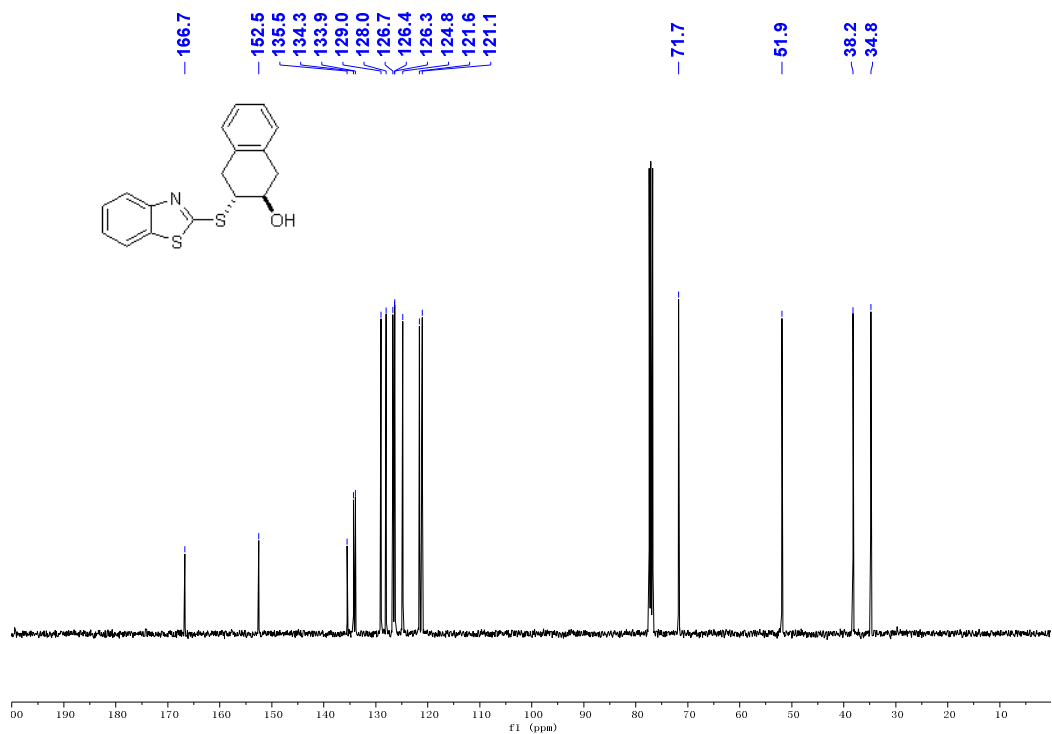

Figure S38. <sup>13</sup>C NMR spectrum of 3n in CDCl<sub>3</sub>



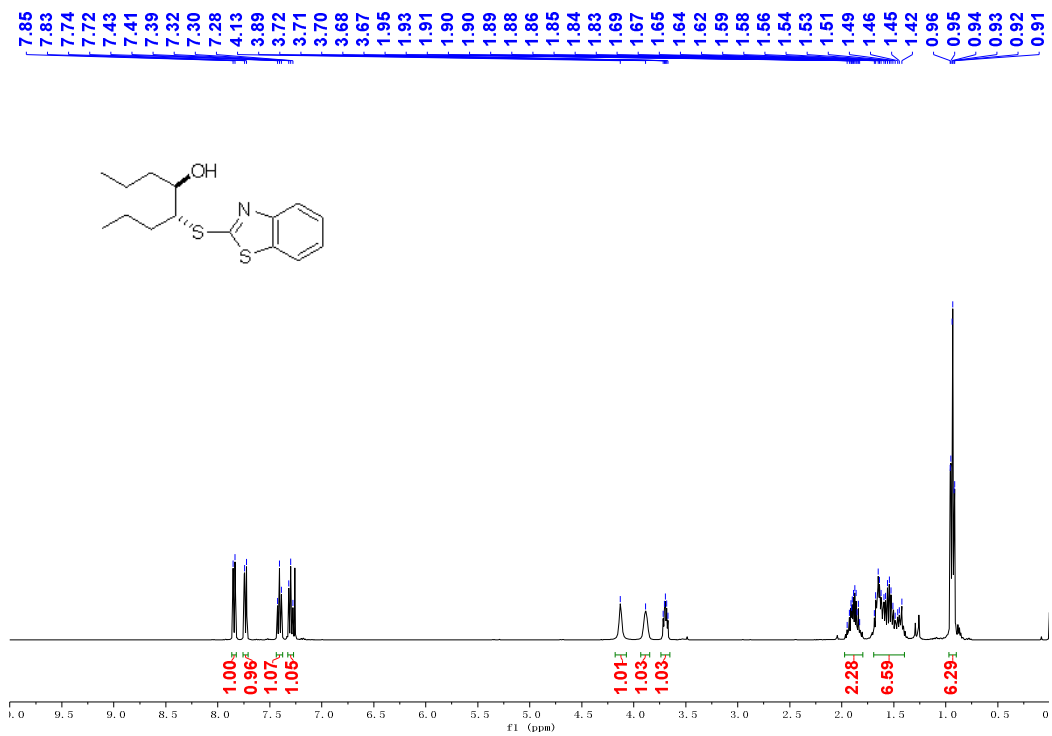

**Figure S39.**  $^1\text{H}$  NMR spectrum of **3o** in  $\text{CDCl}_3$

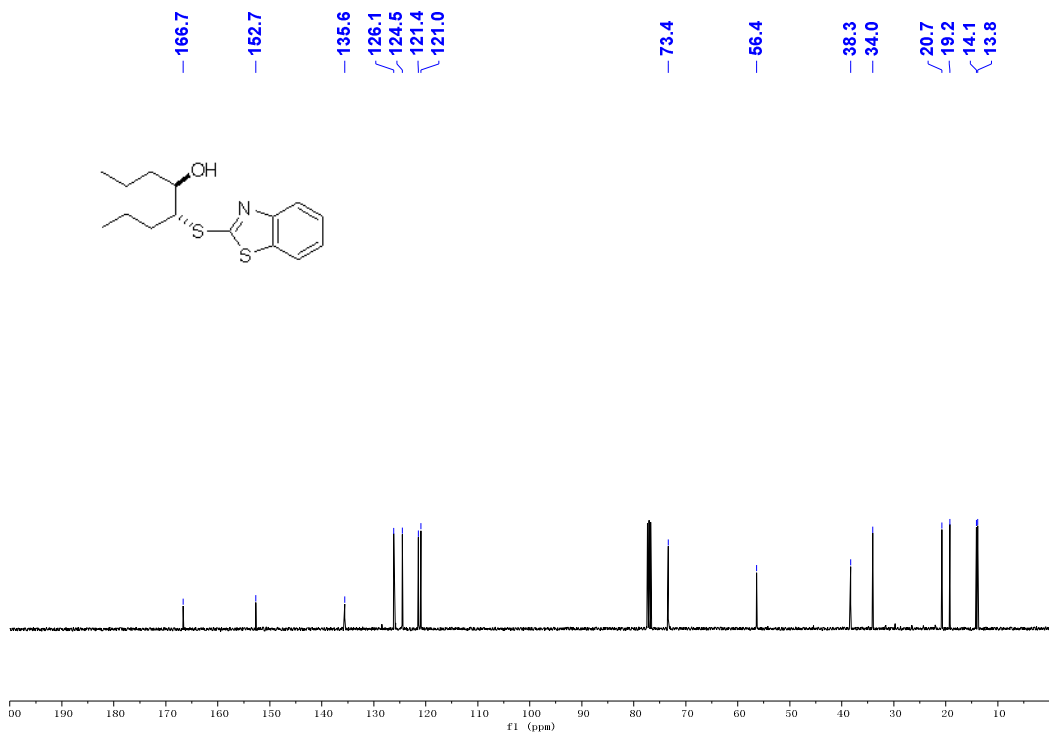

**Figure S40.**  $^{13}\text{C}$  NMR spectrum of **3o** in  $\text{CDCl}_3$

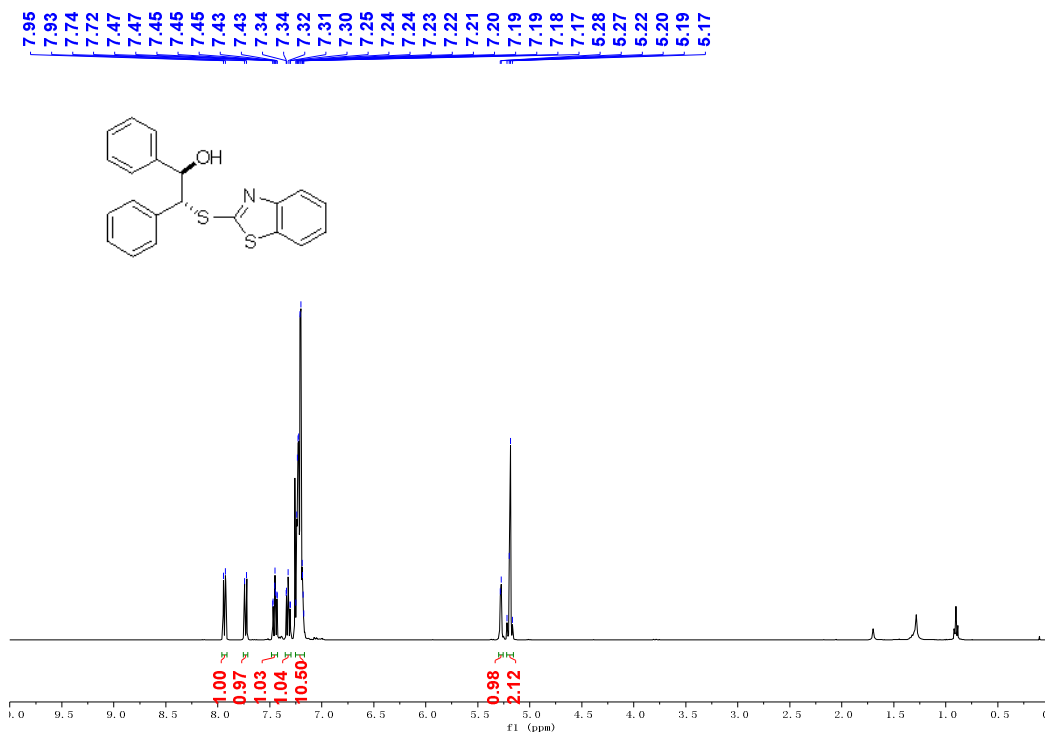

Figure S41. <sup>1</sup>H NMR spectrum of **3p** in CDCl<sub>3</sub>

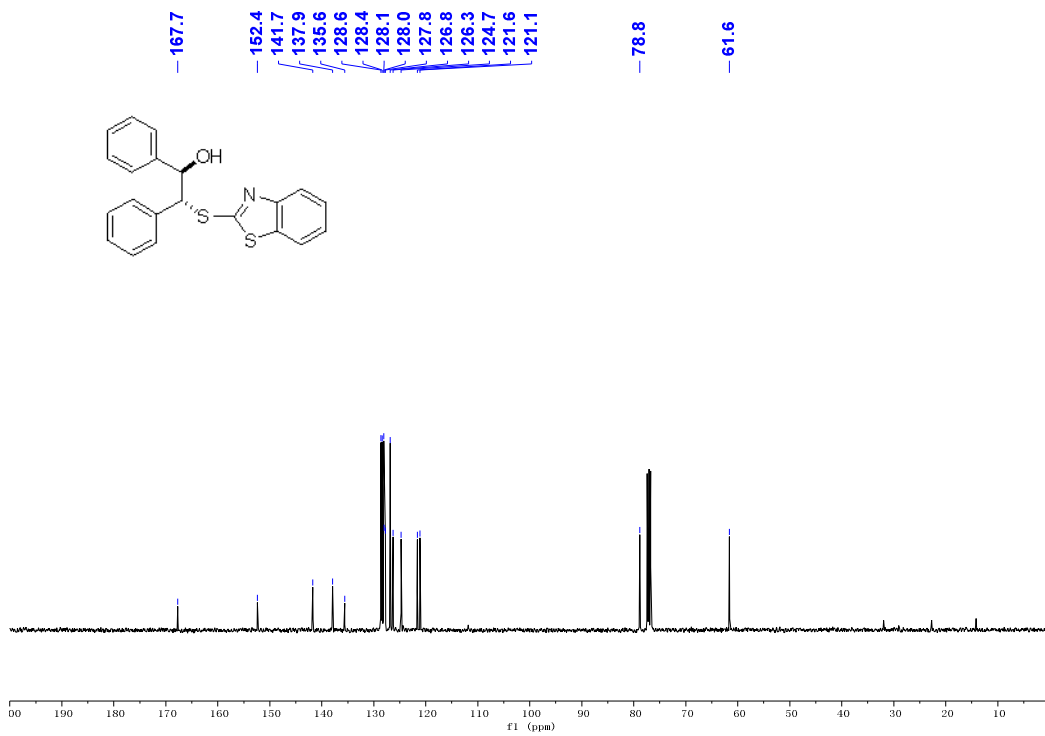

Figure S42. <sup>13</sup>C NMR spectrum of **3p** in CDCl<sub>3</sub>

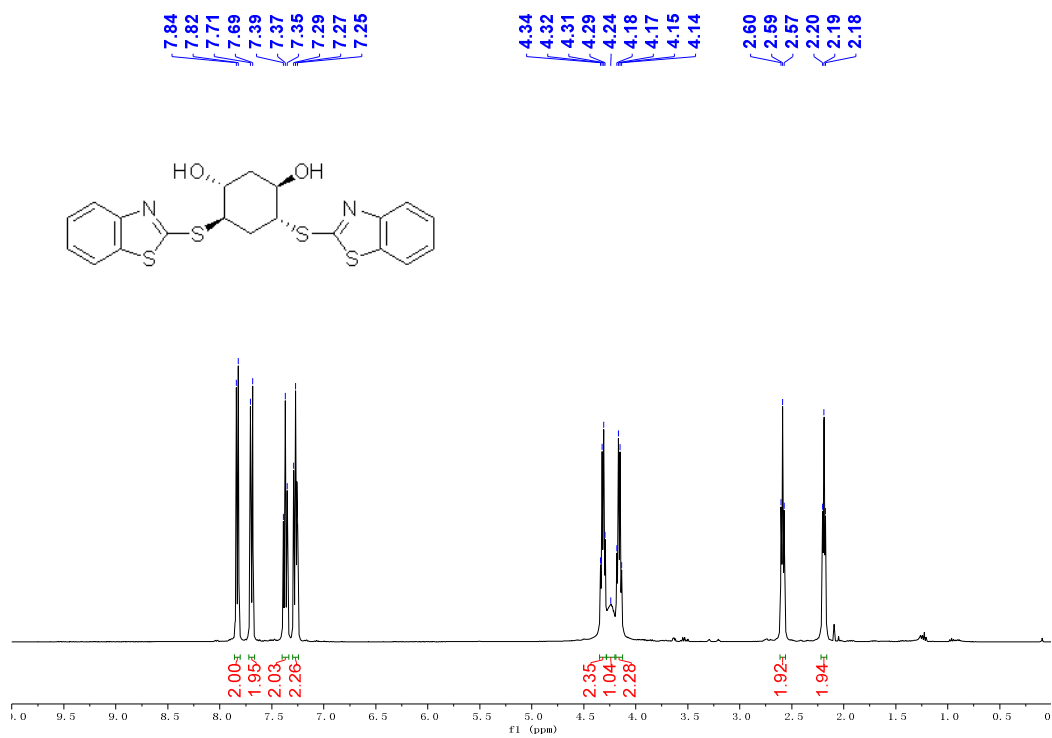

**Figure S43.** <sup>1</sup>H NMR spectrum of **3q** in CDCl<sub>3</sub>

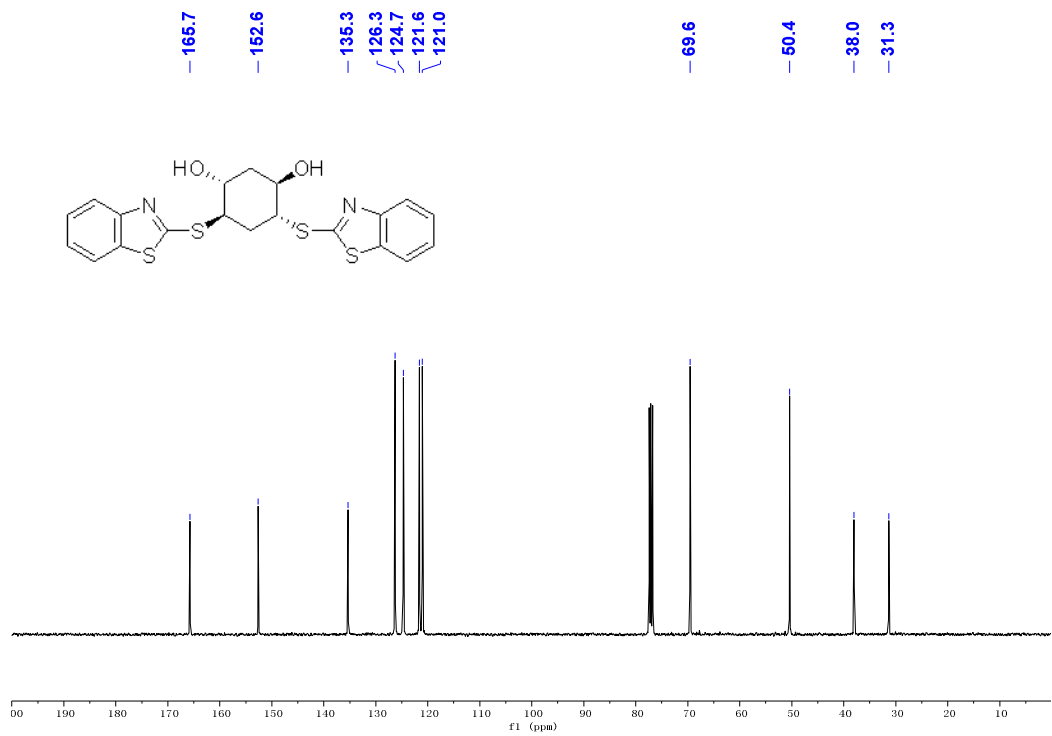

**Figure S44.** <sup>13</sup>C NMR spectrum of **3q** in CDCl<sub>3</sub>

### 3. HPLC copies of products

AD-H, iPrOH/Hex 10/90, flow rate = 1.0 mL/min

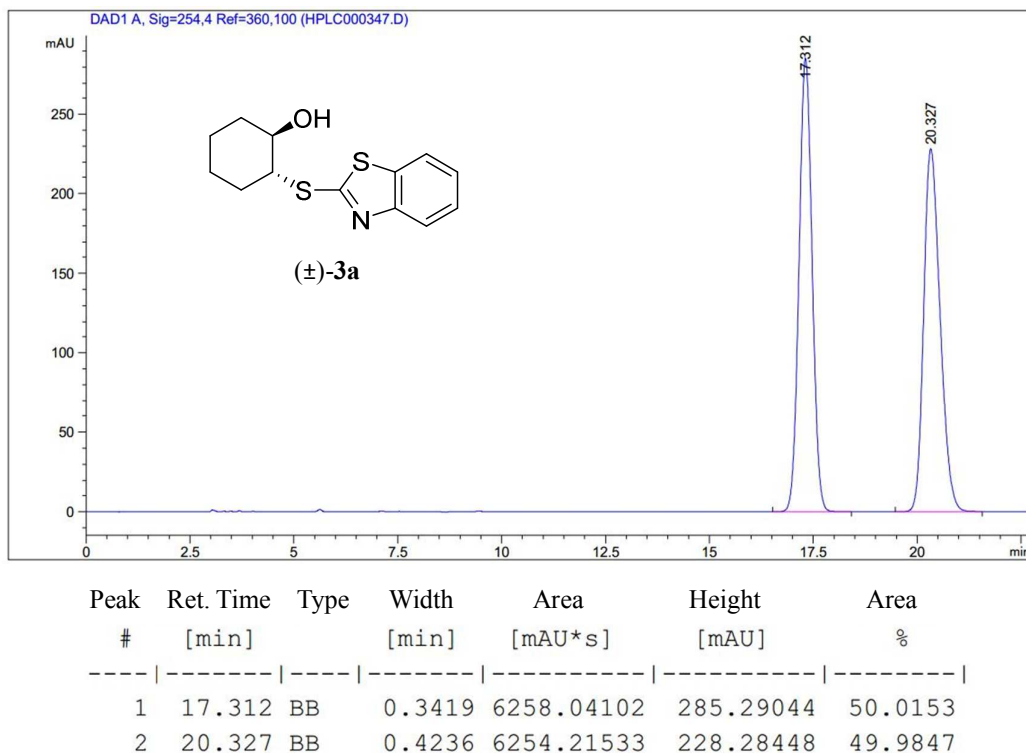

Figure S45. HPLC copies of compound rac-3a

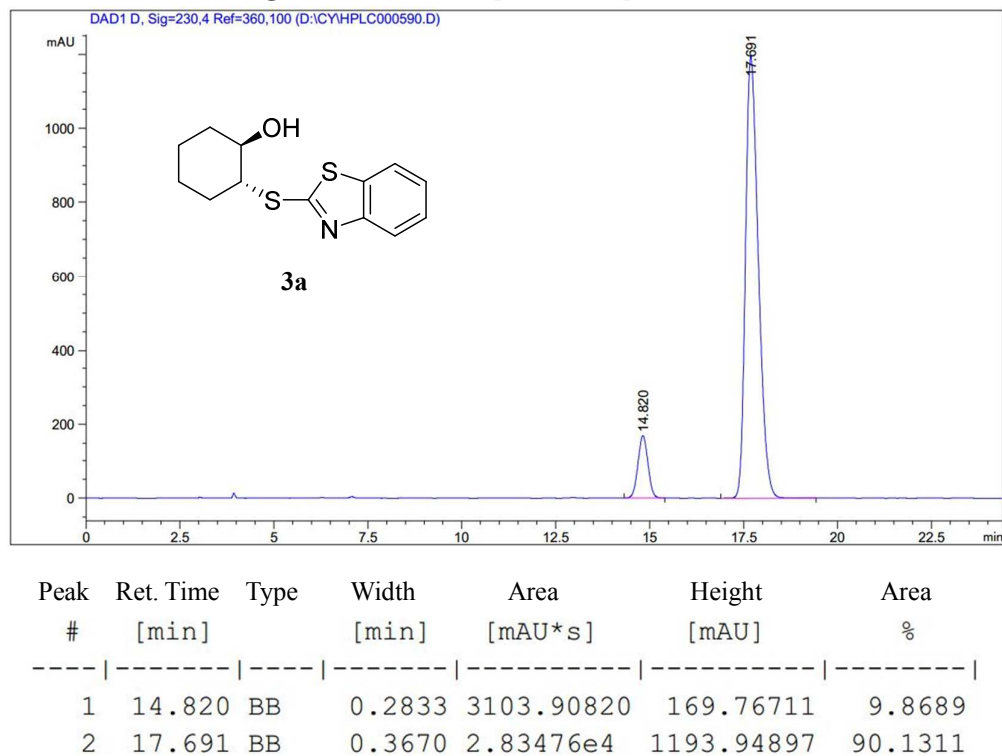

Figure S46. HPLC copies of compound 3a

AD-H, iPrOH/Hex 10/90, flow rate = 1.0 mL/min

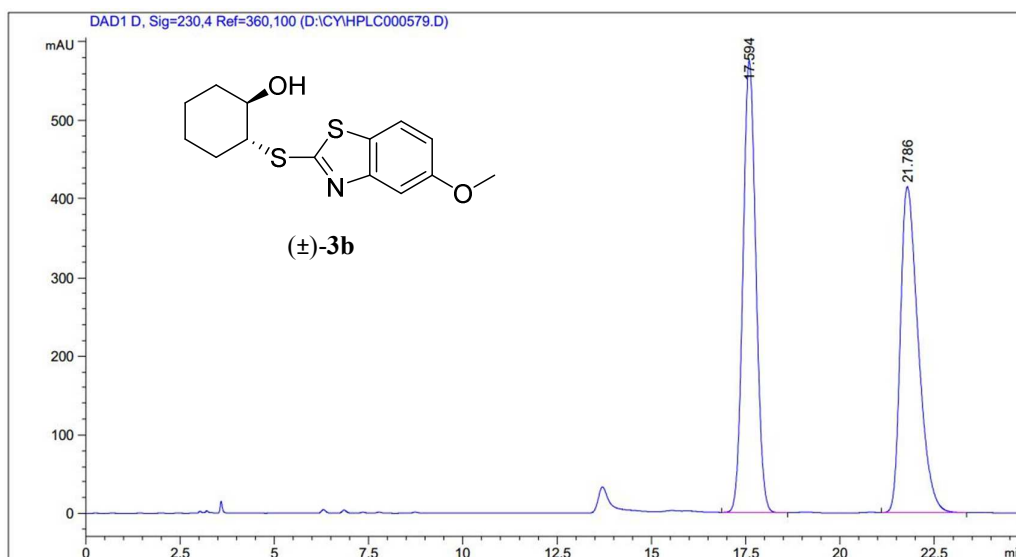

| Peak # | Ret. Time [min] | Type | Width [min] | Area [mAU*s] | Height [mAU] | Area %  |
|--------|-----------------|------|-------------|--------------|--------------|---------|
| 1      | 17.594          | BB   | 0.3699      | 1.37086e4    | 575.56250    | 50.0758 |
| 2      | 21.786          | BB   | 0.5039      | 1.36671e4    | 415.29184    | 49.9242 |

Figure S47. HPLC copies of compound rac-3b

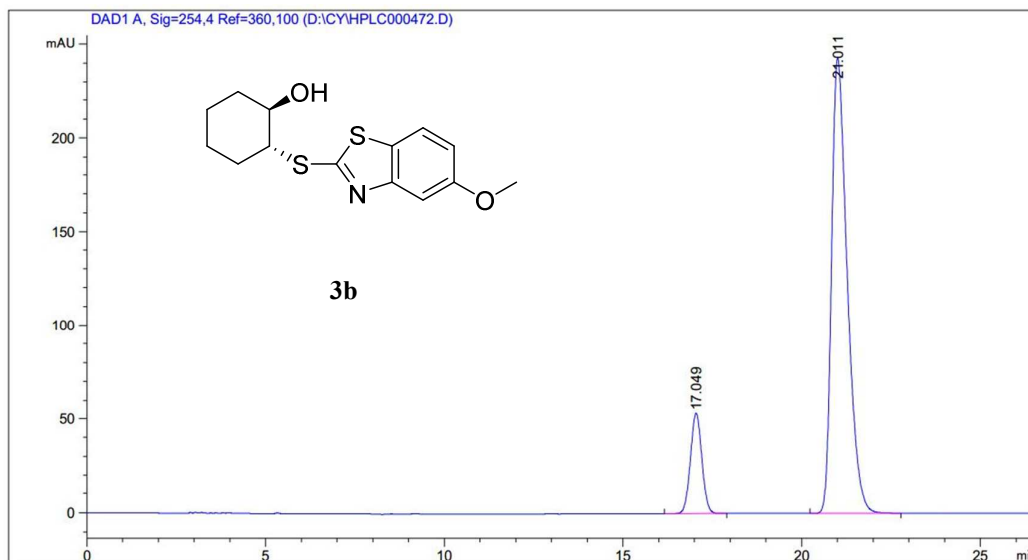

| Peak # | Ret. Time [min] | Type | Width [min] | Area [mAU*s] | Height [mAU] | Area %  |
|--------|-----------------|------|-------------|--------------|--------------|---------|
| 1      | 17.049          | BB   | 0.3453      | 1181.88489   | 53.18024     | 13.8119 |
| 2      | 21.011          | BB   | 0.4621      | 7375.13281   | 242.99344    | 86.1881 |

Figure S48. HPLC copies of compound 3b

AD-H, iPrOH/Hex 10/90, flow rate = 1.0 mL/min

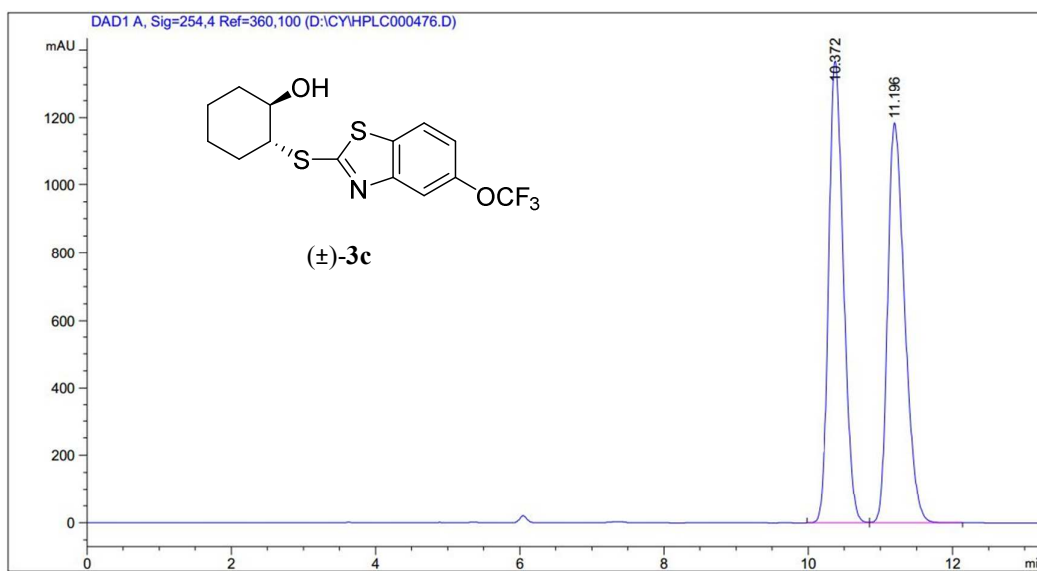

| Peak # | Ret. Time [min] | Type | Width [min] | Area [mAU*s] | Height [mAU] | Area %  |
|--------|-----------------|------|-------------|--------------|--------------|---------|
| 1      | 10.372          | BB   | 0.2189      | 1.93252e4    | 1367.35132   | 49.9911 |
| 2      | 11.196          | BB   | 0.2506      | 1.93321e4    | 1183.27747   | 50.0089 |

Figure S49. HPLC copies of compound rac-3c

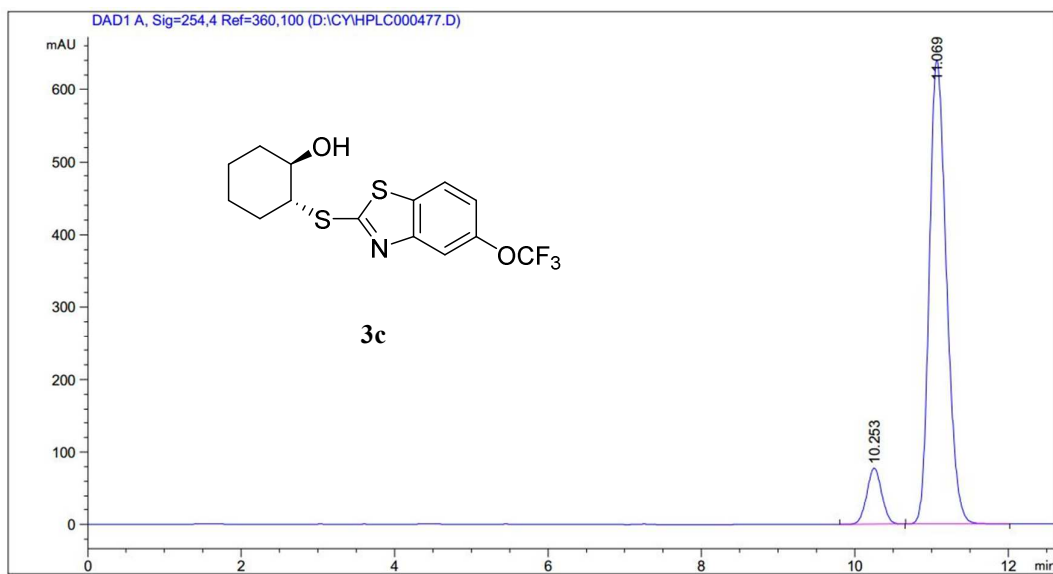

| Peak # | Ret. Time [min] | Type | Width [min] | Area [mAU*s] | Height [mAU] | Area %  |
|--------|-----------------|------|-------------|--------------|--------------|---------|
| 1      | 10.253          | BB   | 0.2118      | 1054.36487   | 77.95897     | 9.5906  |
| 2      | 11.069          | BB   | 0.2392      | 9939.40820   | 640.03607    | 90.4094 |

Figure S50. HPLC copies of compound 3c

AD-H, iPrOH/Hex 10/90, flow rate = 1.0 mL/min

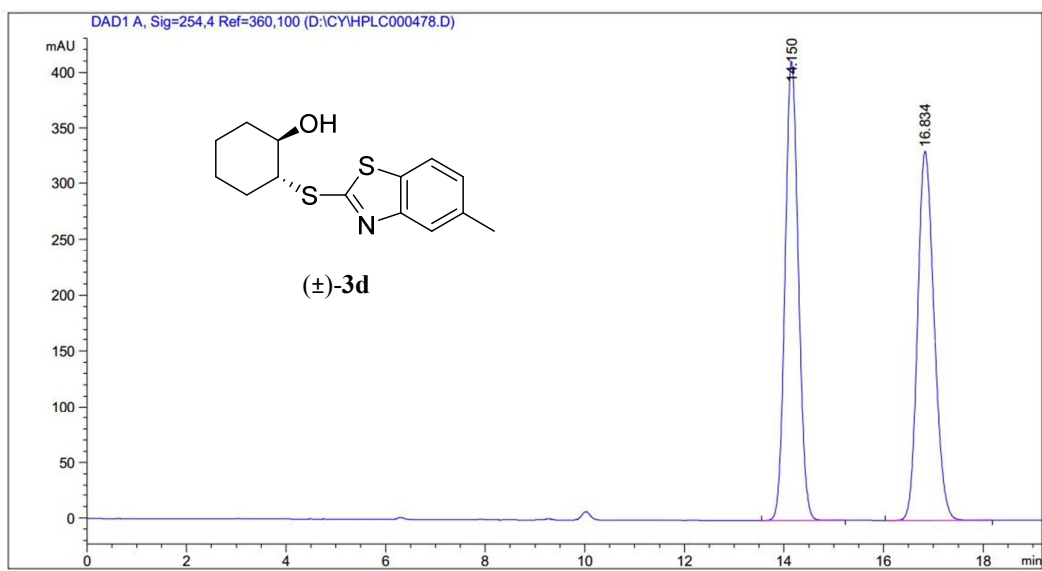

| Peak # | Ret. Time [min] | Type | Width [min] | Area [mAU*s] | Height [mAU] | Area %  |
|--------|-----------------|------|-------------|--------------|--------------|---------|
| 1      | 14.150          | BB   | 0.2899      | 7620.70605   | 411.86768    | 49.9649 |
| 2      | 16.834          | BB   | 0.3564      | 7631.40186   | 331.68381    | 50.0351 |

Figure S51. HPLC copies of compound rac-3d

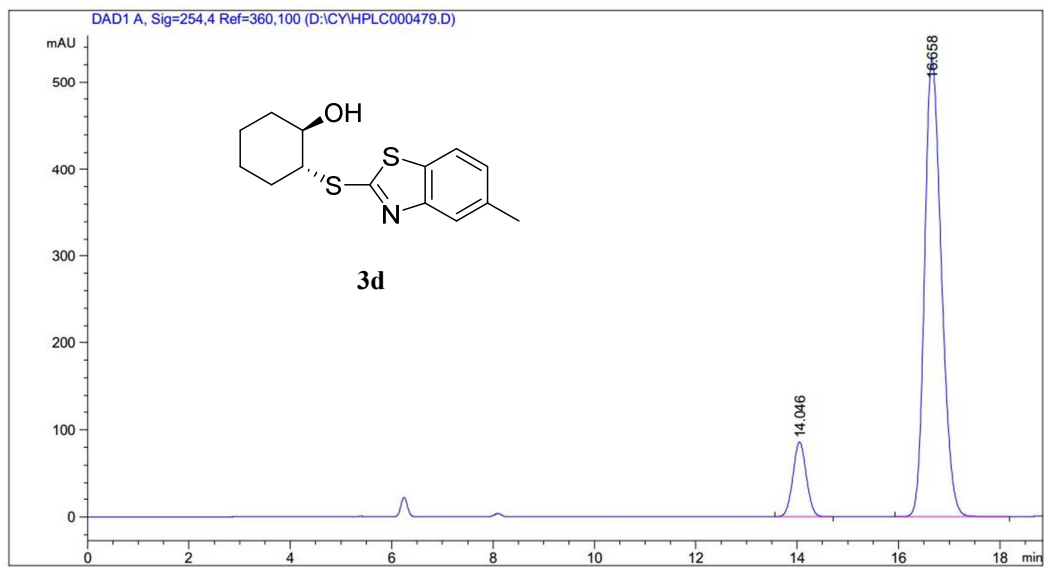

| Peak # | Ret. Time [min] | Type | Width [min] | Area [mAU*s] | Height [mAU] | Area %  |
|--------|-----------------|------|-------------|--------------|--------------|---------|
| 1      | 14.046          | BB   | 0.2859      | 1575.76318   | 85.95020     | 11.5195 |
| 2      | 16.658          | BB   | 0.3579      | 1.21033e4    | 527.17896    | 88.4805 |

Figure S52. HPLC copies of compound 3d

AD-H, iPrOH/Hex 10/90, flow rate = 1.0 mL/min

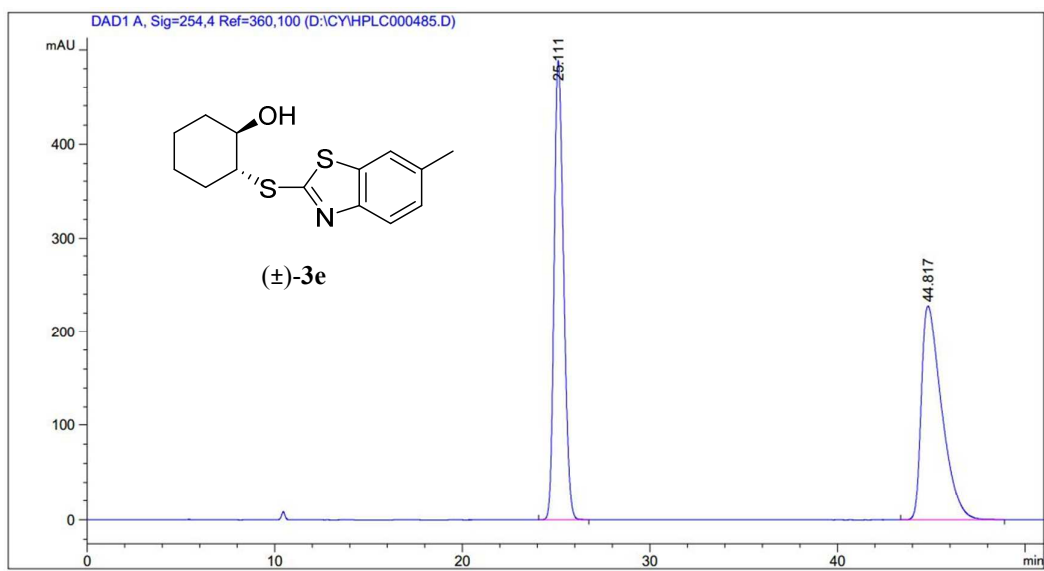

| Peak # | Ret. Time [min] | Type | Width [min] | Area [mAU*s] | Height [mAU] | Area %  |
|--------|-----------------|------|-------------|--------------|--------------|---------|
| 1      | 25.111          | BB   | 0.5450      | 1.70377e4    | 488.33844    | 49.9729 |
| 2      | 44.817          | BB   | 1.1393      | 1.70562e4    | 227.33032    | 50.0271 |

Figure S53. HPLC copies of compound rac-3e

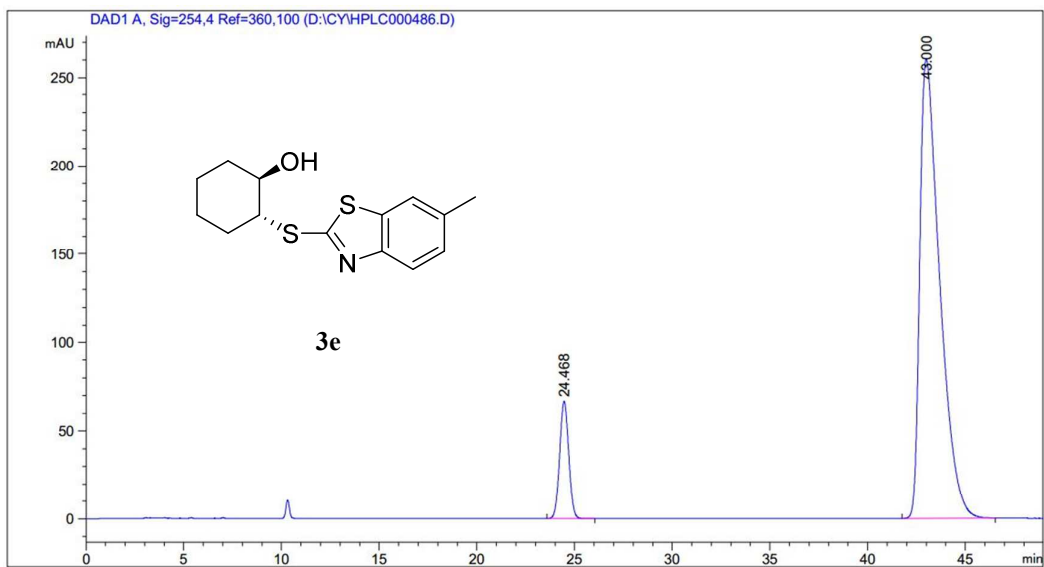

| Peak # | Ret. Time [min] | Type | Width [min] | Area [mAU*s] | Height [mAU] | Area %  |
|--------|-----------------|------|-------------|--------------|--------------|---------|
| 1      | 24.468          | BB   | 0.5022      | 2145.77100   | 66.54942     | 10.4290 |
| 2      | 43.000          | BB   | 1.0736      | 1.84293e4    | 260.43127    | 89.5710 |

Figure S54. HPLC copies of compound 3e



AD-H, iPrOH/Hex 10/90, flow rate = 1.0 mL/min

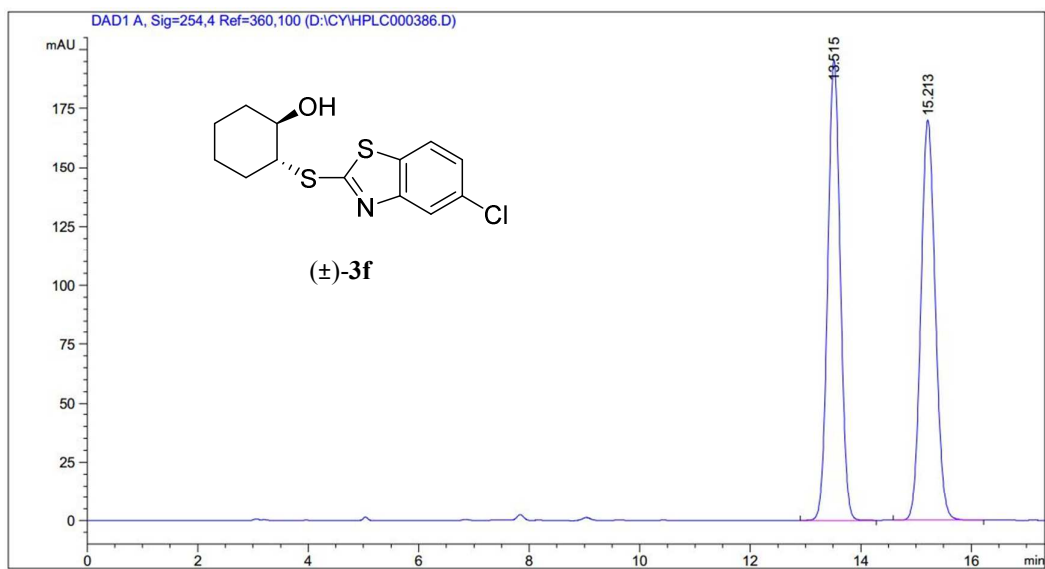

| Peak # | Ret. Time [min] | Type | Width [min] | Area [mAU*s] | Height [mAU] | Area %  |
|--------|-----------------|------|-------------|--------------|--------------|---------|
| 1      | 13.515          | BB   | 0.2452      | 3068.63403   | 195.43034    | 49.9232 |
| 2      | 15.213          | BB   | 0.2814      | 3078.07739   | 169.85976    | 50.0768 |

Figure S55. HPLC copies of compound rac-3f

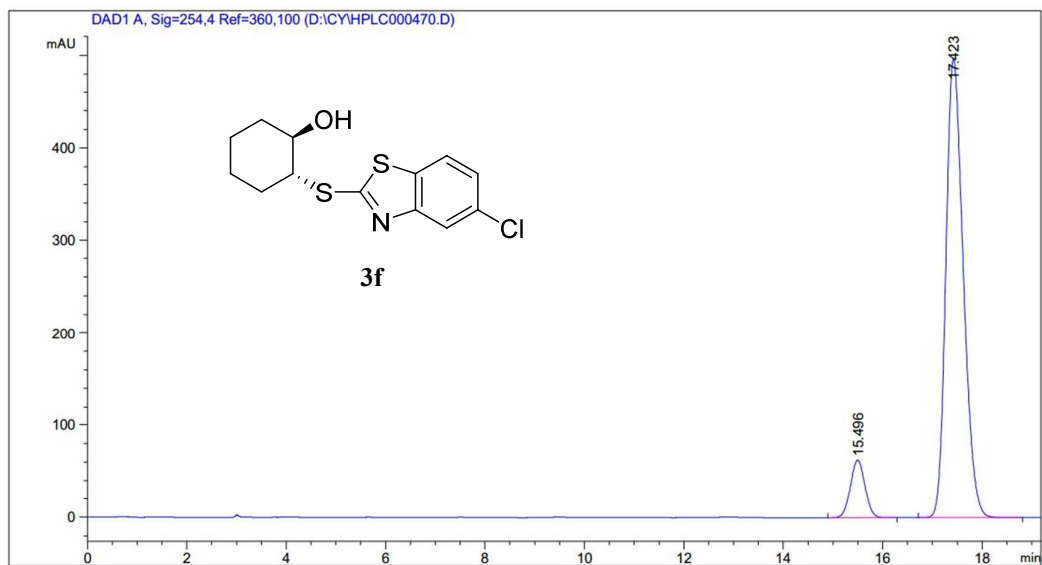

| Peak # | Ret. Time [min] | Type | Width [min] | Area [mAU*s] | Height [mAU] | Area %  |
|--------|-----------------|------|-------------|--------------|--------------|---------|
| 1      | 15.496          | BB   | 0.3170      | 1276.31934   | 62.83426     | 9.5569  |
| 2      | 17.423          | BB   | 0.3757      | 1.20786e4    | 496.67197    | 90.4431 |

Figure S56. HPLC copies of compound 3f

AD-H, iPrOH/Hex 10/90, flow rate = 1.0 mL/min

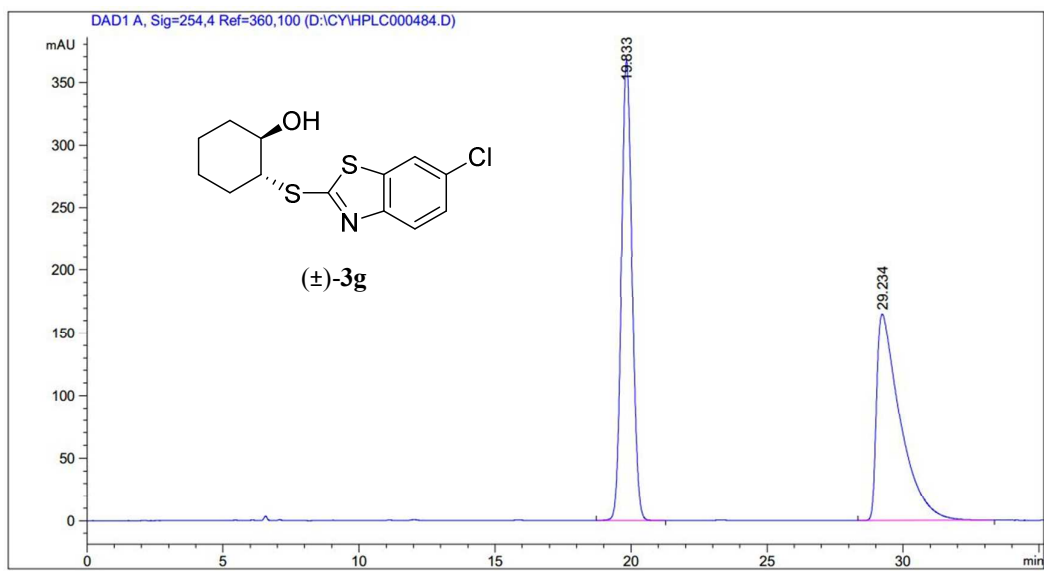

| Peak # | Ret. Time [min] | Type | Width [min] | Area [mAU*s] | Height [mAU] | Area %  |
|--------|-----------------|------|-------------|--------------|--------------|---------|
| 1      | 19.833          | BB   | 0.4243      | 1.00166e4    | 367.08221    | 50.0915 |
| 2      | 29.234          | BB   | 0.8489      | 9980.04004   | 165.18932    | 49.9085 |

Figure S57. HPLC copies of compound rac-3g

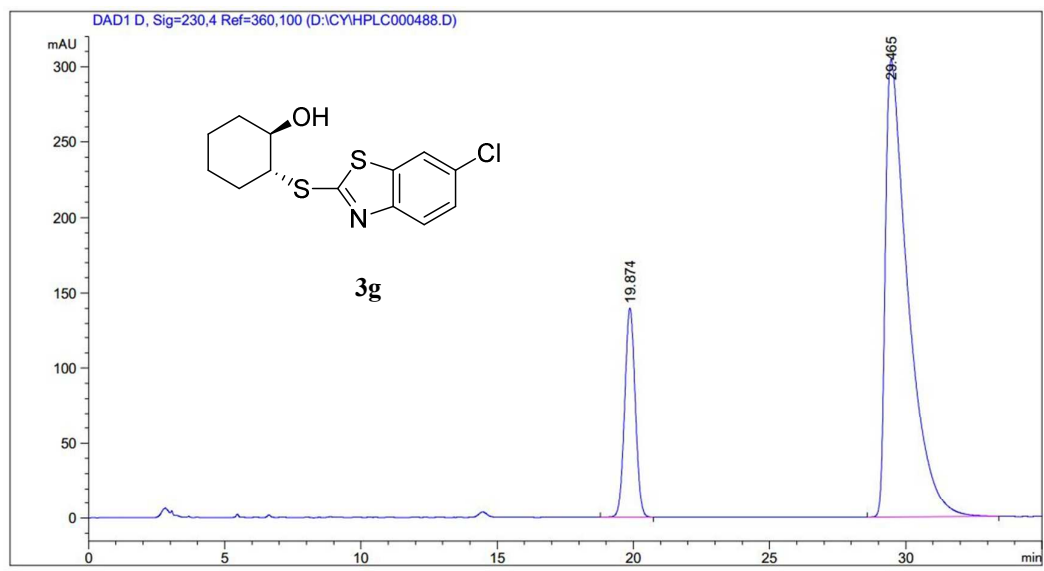

| Peak # | Ret. Time [min] | Type | Width [min] | Area [mAU*s] | Height [mAU] | Area %  |
|--------|-----------------|------|-------------|--------------|--------------|---------|
| 1      | 19.874          | BB   | 0.4204      | 3764.62622   | 139.71402    | 17.5971 |
| 2      | 29.465          | BB   | 0.8344      | 1.76288e4    | 304.08557    | 82.4029 |

Figure S58. HPLC copies of compound 3g

AD-H, iPrOH/Hex 10/90, flow rate = 1.0 mL/min

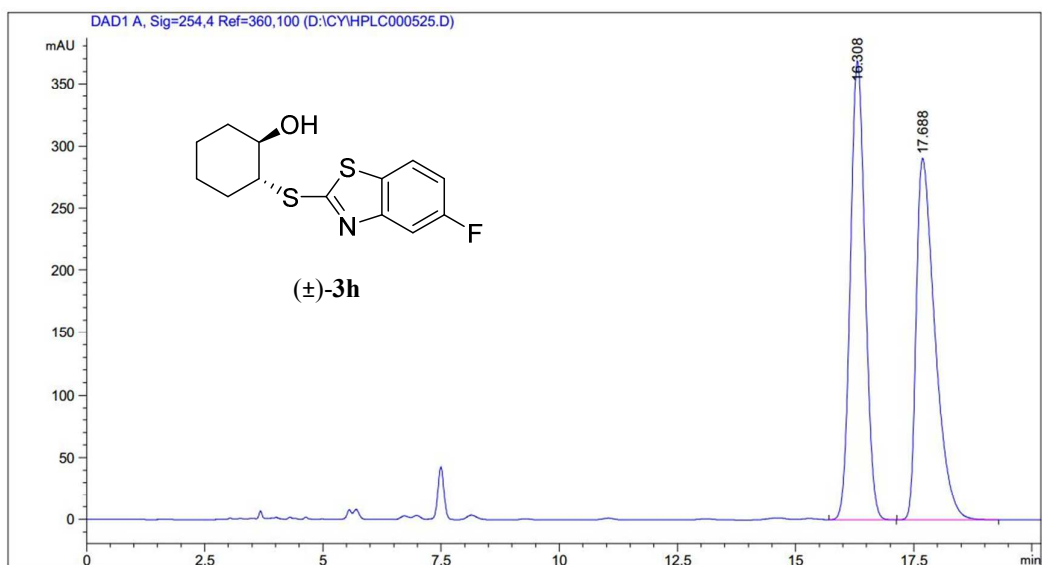

| Peak # | Ret. Time [min] | Type | Width [min] | Area [mAU*s] | Height [mAU] | Area %  |
|--------|-----------------|------|-------------|--------------|--------------|---------|
| 1      | 16.308          | BB   | 0.3389      | 7987.84863   | 368.47336    | 49.9782 |
| 2      | 17.688          | BB   | 0.4169      | 7994.81592   | 290.64139    | 50.0218 |

Figure S59. HPLC copies of compound rac-3h

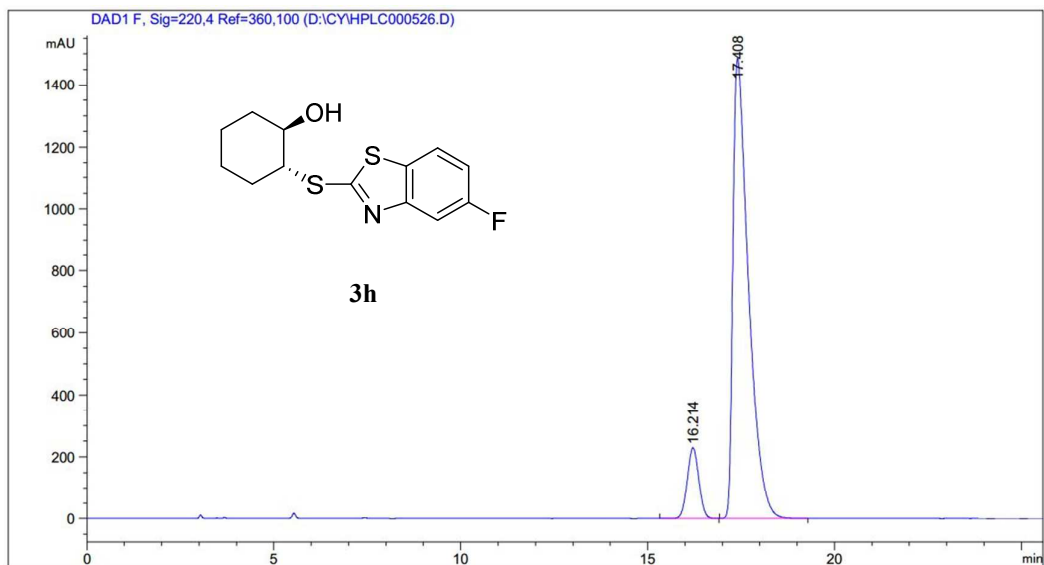

| Peak # | Ret. Time [min] | Type | Width [min] | Area [mAU*s] | Height [mAU] | Area %  |
|--------|-----------------|------|-------------|--------------|--------------|---------|
| 1      | 16.214          | BB   | 0.3382      | 4953.45361   | 229.10614    | 10.3511 |
| 2      | 17.408          | BB   | 0.4311      | 4.29010e4    | 1484.92041   | 89.6489 |

Figure S60. HPLC copies of compound 3h

AD-H, iPrOH/Hex 20/80, flow rate = 1.0 mL/min

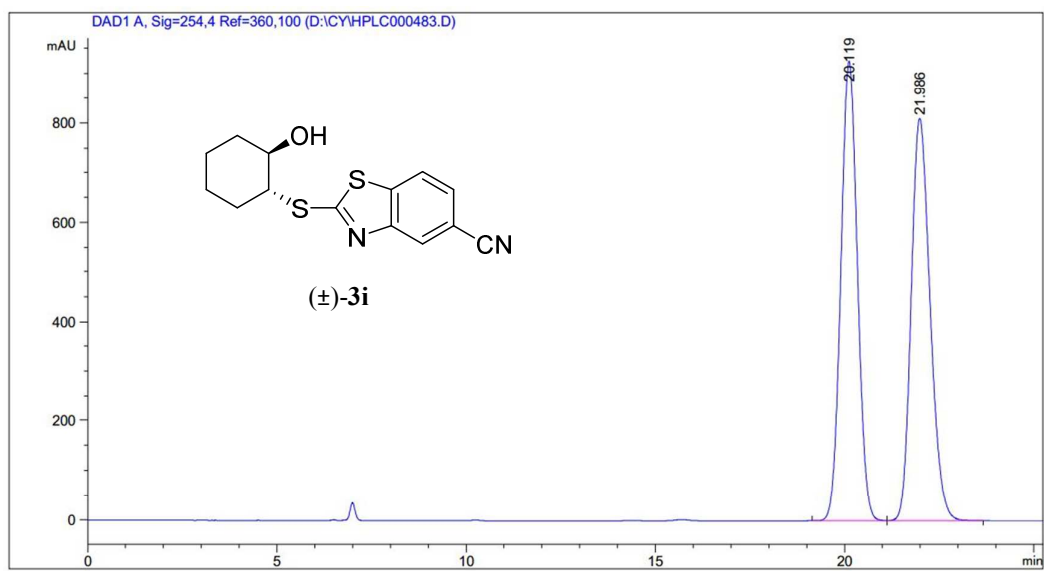

| Peak # | Ret. Time [min] | Type | Width [min] | Area [mAU*s] | Height [mAU] | Area %  |
|--------|-----------------|------|-------------|--------------|--------------|---------|
| 1      | 20.119          | BB   | 0.4740      | 2.80851e4    | 925.62012    | 49.9842 |
| 2      | 21.986          | BB   | 0.5387      | 2.81029e4    | 810.22986    | 50.0158 |

Figure S61. HPLC copies of compound rac-3i

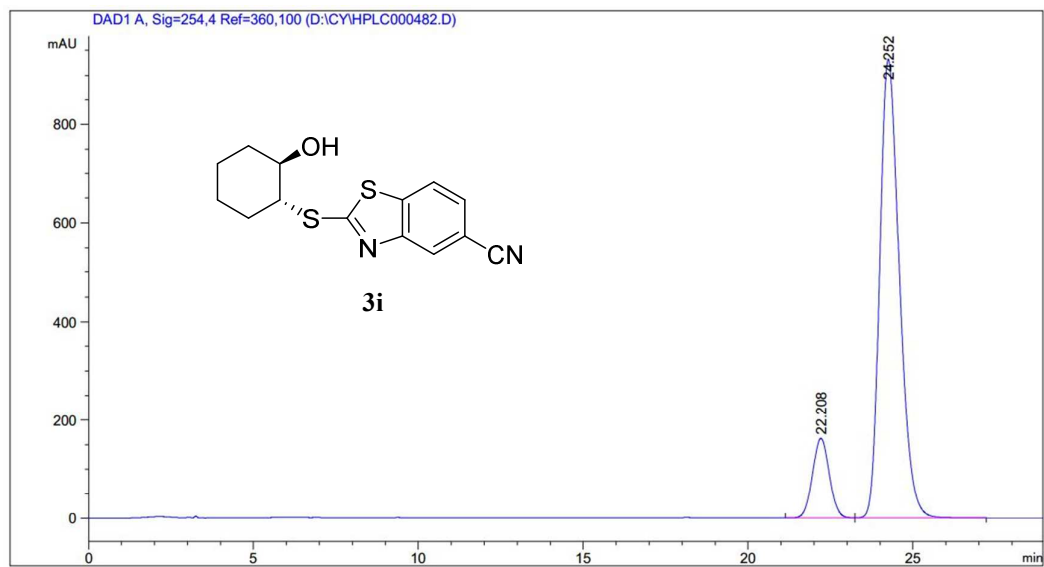

| Peak # | Ret. Time [min] | Type | Width [min] | Area [mAU*s] | Height [mAU] | Area %  |
|--------|-----------------|------|-------------|--------------|--------------|---------|
| 1      | 22.208          | BB   | 0.5540      | 5759.89111   | 162.31488    | 12.9925 |
| 2      | 24.252          | BB   | 0.6389      | 3.85724e4    | 931.86798    | 87.0075 |

Figure S62. HPLC copies of compound 3i

AD-H, iPrOH/Hex 30/70, flow rate = 1.0 mL/min

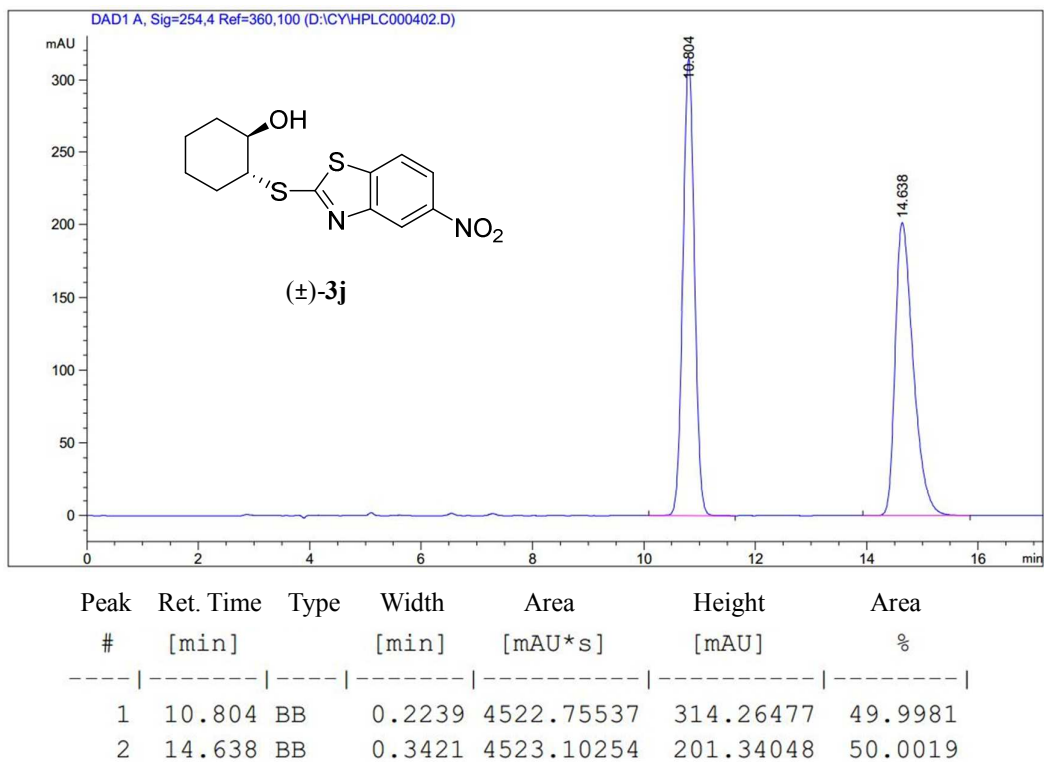

Figure S63. HPLC copies of compound rac-3j

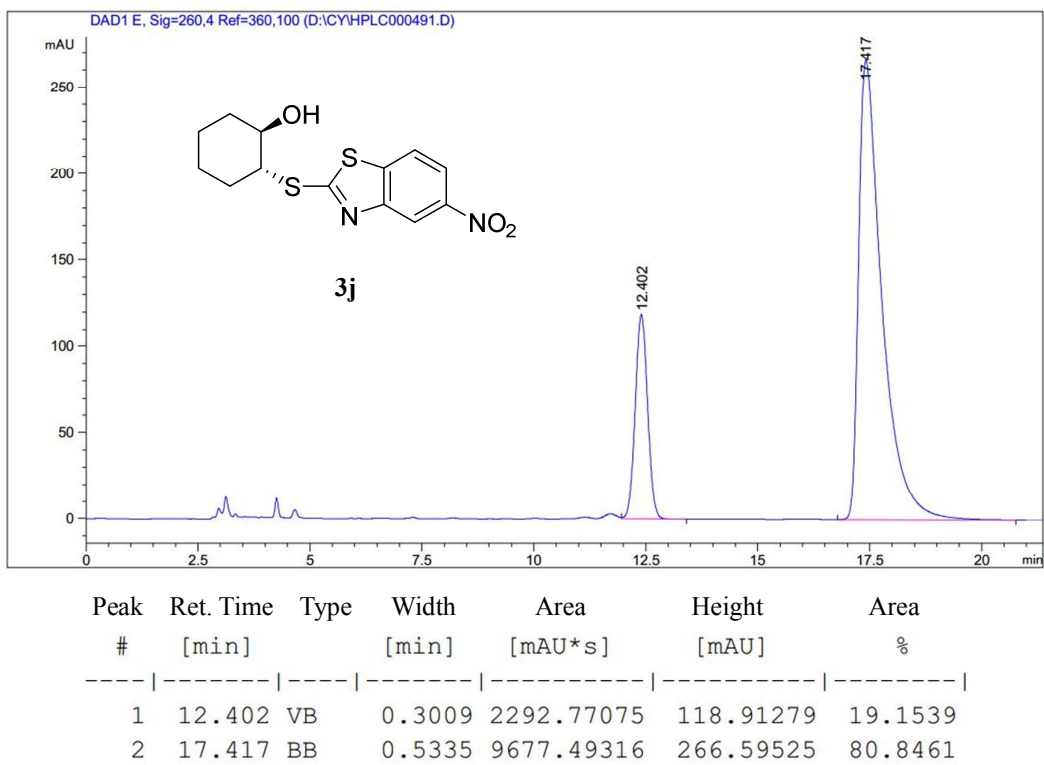

Figure S64. HPLC copies of compound 3j

AD-H, iPrOH/Hex 10/90, flow rate = 1.0 mL/min

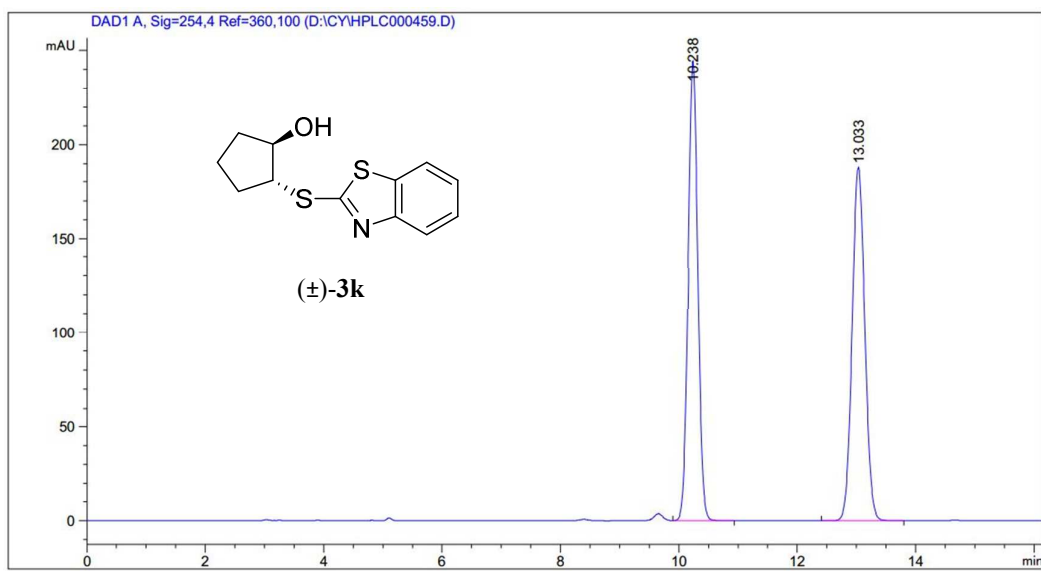

| Peak # | Ret. Time [min] | Type | Width [min] | Area [mAU*s] | Height [mAU] | Area %  |
|--------|-----------------|------|-------------|--------------|--------------|---------|
| 1      | 10.238          | BB   | 0.1772      | 2792.41040   | 244.51637    | 49.9766 |
| 2      | 13.033          | BB   | 0.2313      | 2795.02148   | 188.19705    | 50.0234 |

Figure S65. HPLC copies of compound rac-3k

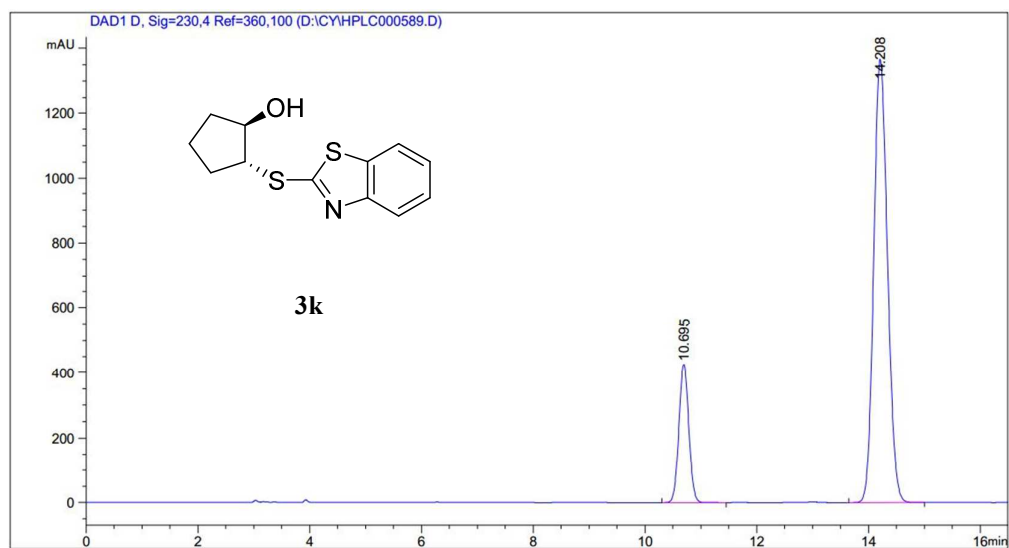

| Peak # | Ret. Time [min] | Type | Width [min] | Area [mAU*s] | Height [mAU] | Area %  |
|--------|-----------------|------|-------------|--------------|--------------|---------|
| 1      | 10.695          | BB   | 0.1917      | 5255.42871   | 426.78342    | 18.3880 |
| 2      | 14.208          | BB   | 0.2672      | 2.33253e4    | 1365.82117   | 81.6120 |

Figure S66. HPLC copies of compound 3k

AD-H, iPrOH/Hex 10/90, flow rate = 1.0 mL/min

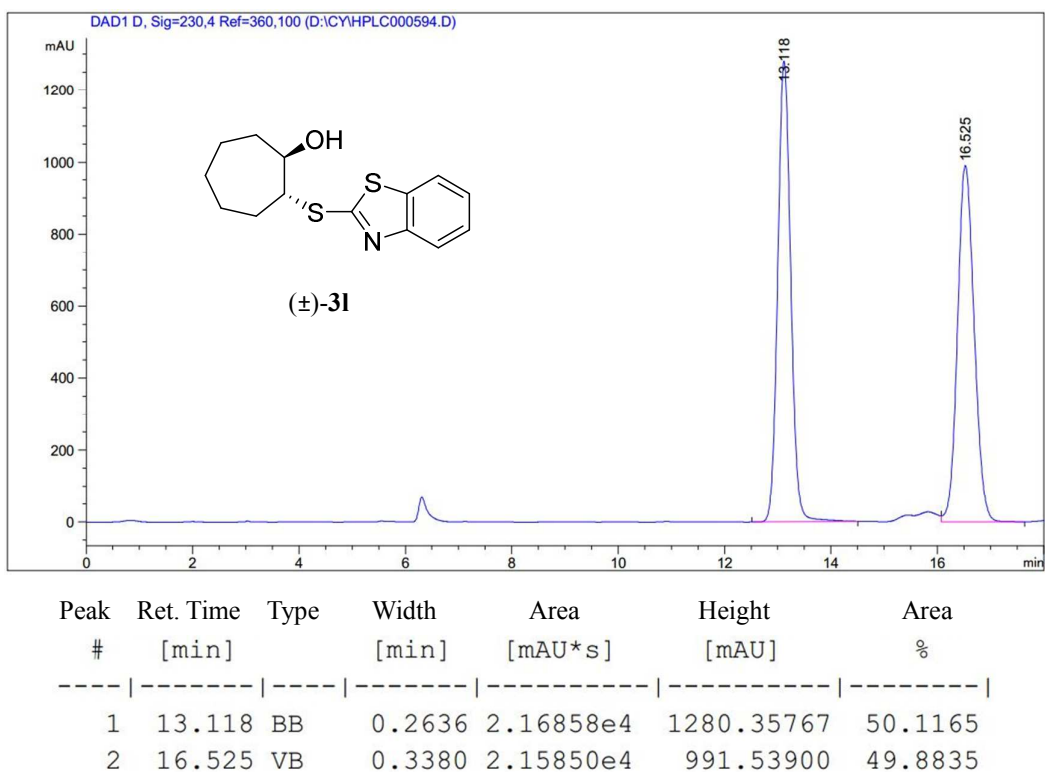

Figure S67. HPLC copies of compound rac-31

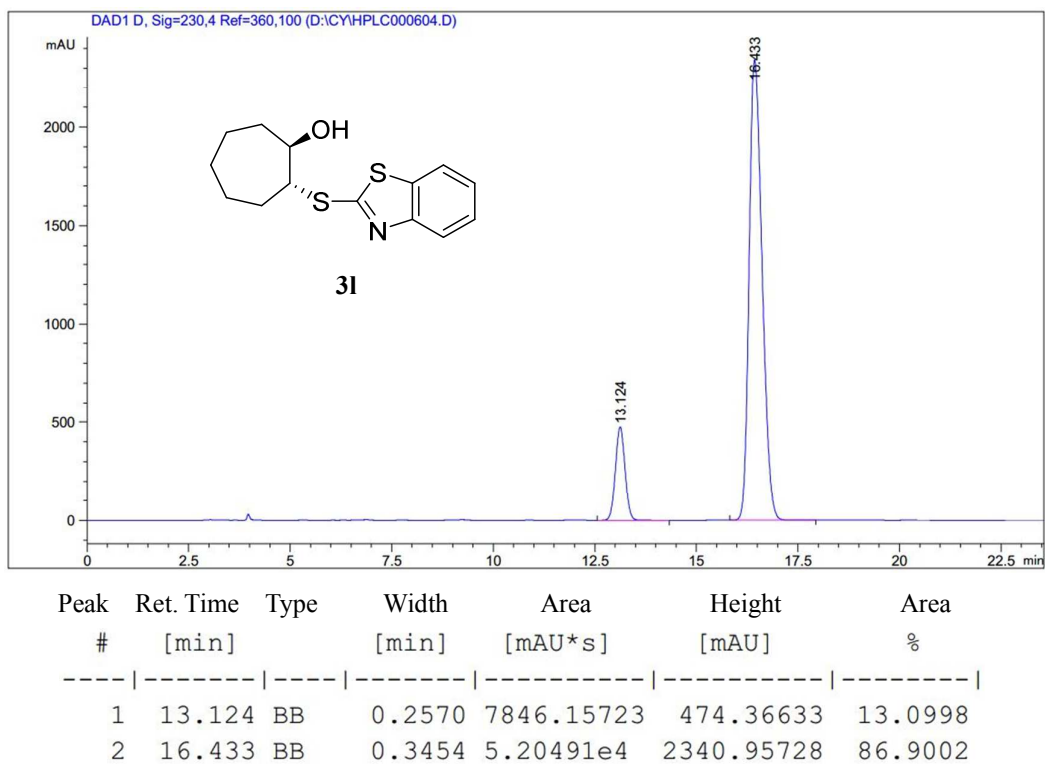

Figure S68. HPLC copies of compound 31

AD-H, iPrOH/Hex 10/90, flow rate = 1.0 mL/min

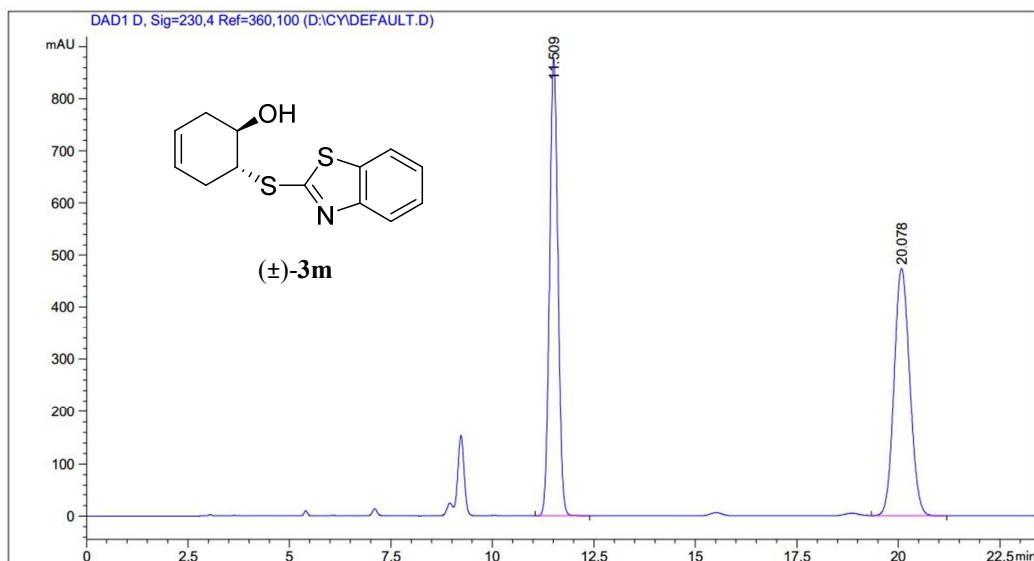

| Peak # | Ret. Time [min] | Type | Width [min] | Area [mAU*s] | Height [mAU] | Area %  |
|--------|-----------------|------|-------------|--------------|--------------|---------|
| 1      | 11.509          | BB   | 0.2239      | 1.26099e4    | 875.95129    | 49.8997 |
| 2      | 20.078          | BB   | 0.4158      | 1.26606e4    | 473.67377    | 50.1003 |

Figure S69. HPLC copies of compound rac-3m

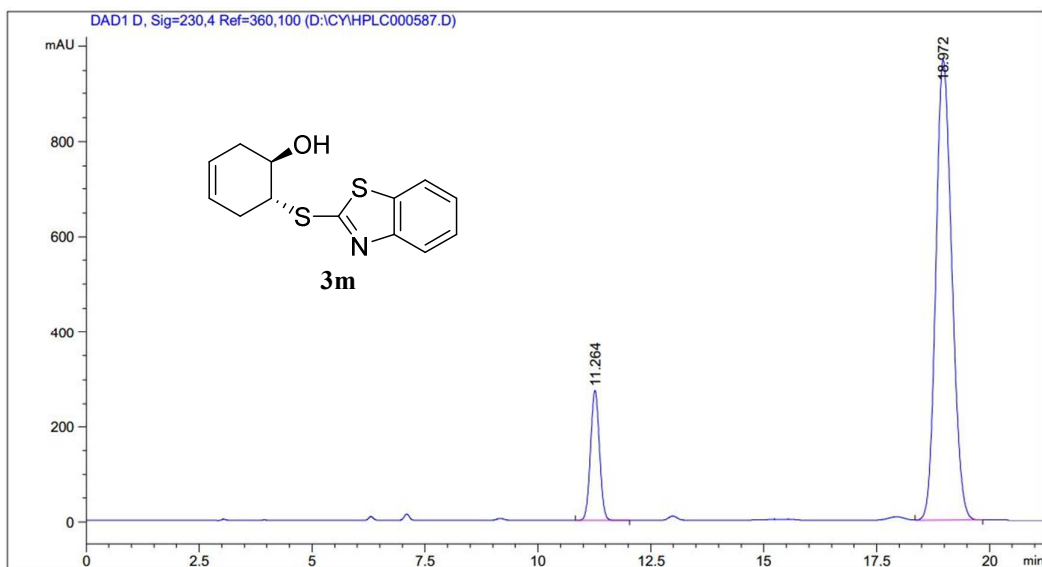

| Peak # | Ret. Time [min] | Type | Width [min] | Area [mAU*s] | Height [mAU] | Area %  |
|--------|-----------------|------|-------------|--------------|--------------|---------|
| 1      | 11.264          | BB   | 0.2143      | 3771.51782   | 274.56259    | 13.6575 |
| 2      | 18.972          | VB   | 0.3854      | 2.38434e4    | 967.75299    | 86.3425 |

Figure S70. HPLC copies of compound 3m



AD-H, iPrOH/Hex 10/90, flow rate = 1.0 mL/min

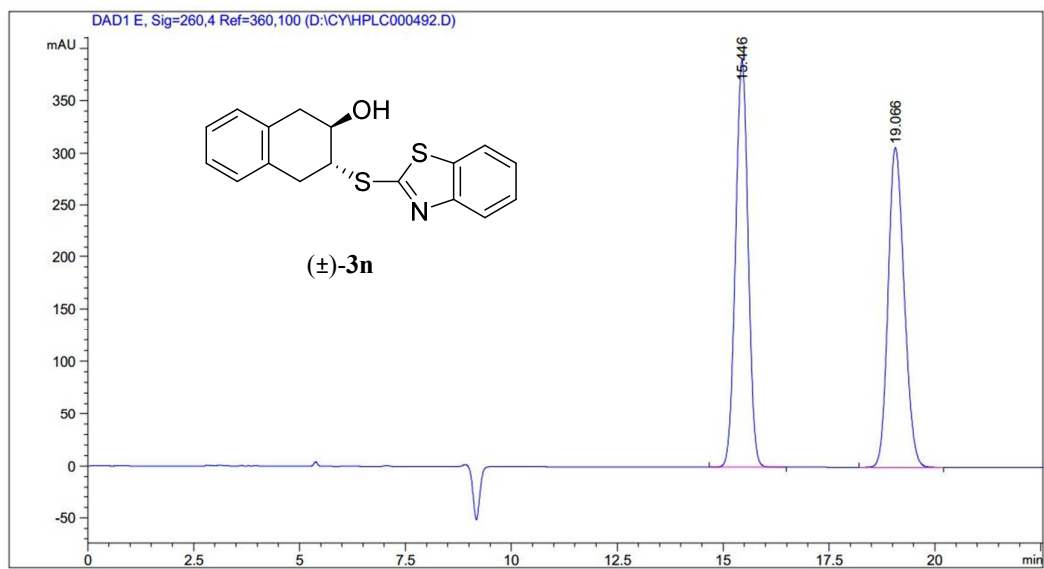

| Peak # | Ret. Time [min] | Type | Width [min] | Area [mAU*s] | Height [mAU] | Area %  |
|--------|-----------------|------|-------------|--------------|--------------|---------|
| 1      | 15.446          | BB   | 0.3207      | 8048.61475   | 390.13434    | 49.9748 |
| 2      | 19.066          | BB   | 0.4108      | 8056.73340   | 306.42227    | 50.0252 |

Figure S71. HPLC copies of compound rac-3n

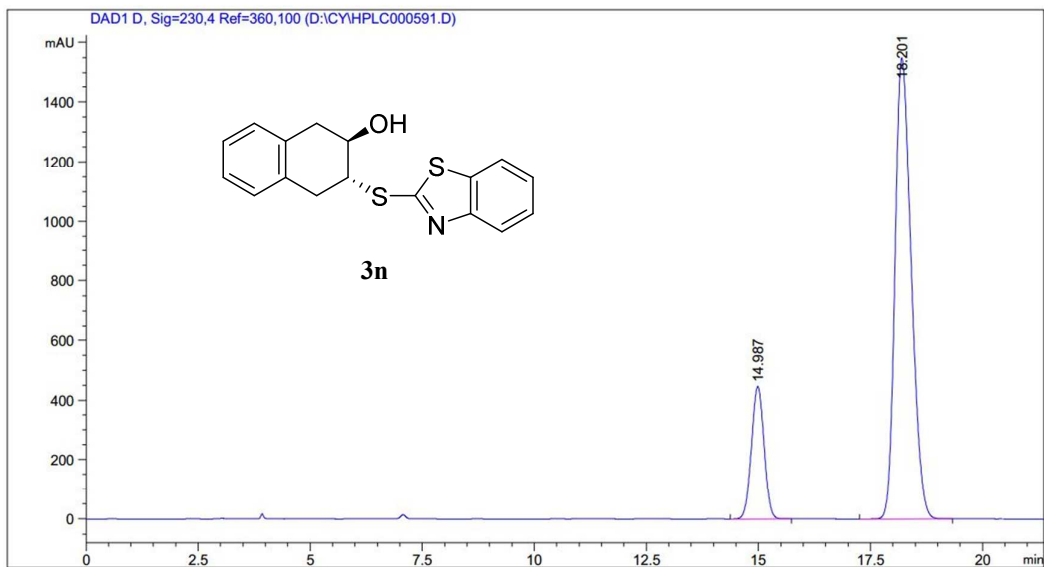

| Peak # | Ret. Time [min] | Type | Width [min] | Area [mAU*s] | Height [mAU] | Area %  |
|--------|-----------------|------|-------------|--------------|--------------|---------|
| 1      | 14.987          | BB   | 0.3057      | 8728.25195   | 447.22971    | 18.2838 |
| 2      | 18.201          | BB   | 0.3921      | 3.90094e4    | 1547.55017   | 81.7162 |

Figure S72. HPLC copies of compound 3n

AD-H, iPrOH/Hex 10/90, flow rate = 1.0 mL/min

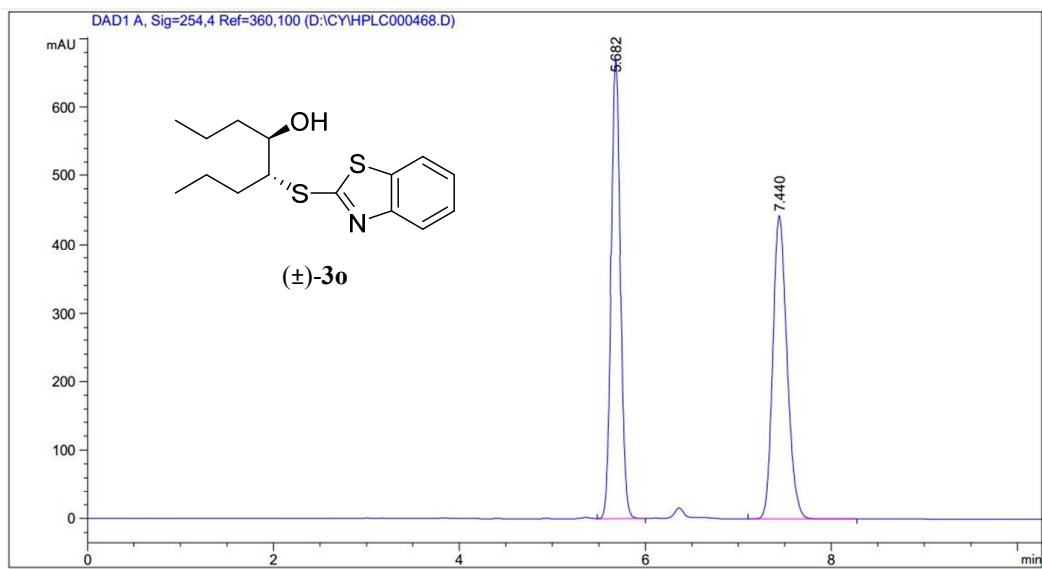

| Peak # | Ret. Time [min] | Type | Width [min] | Area [mAU*s] | Height [mAU] | Area %  |
|--------|-----------------|------|-------------|--------------|--------------|---------|
| 1      | 5.682           | BB   | 0.1091      | 4655.03320   | 669.84845    | 49.8451 |
| 2      | 7.440           | BB   | 0.1637      | 4683.96875   | 441.89224    | 50.1549 |

Figure S73. HPLC copies of compound **rac-3o**

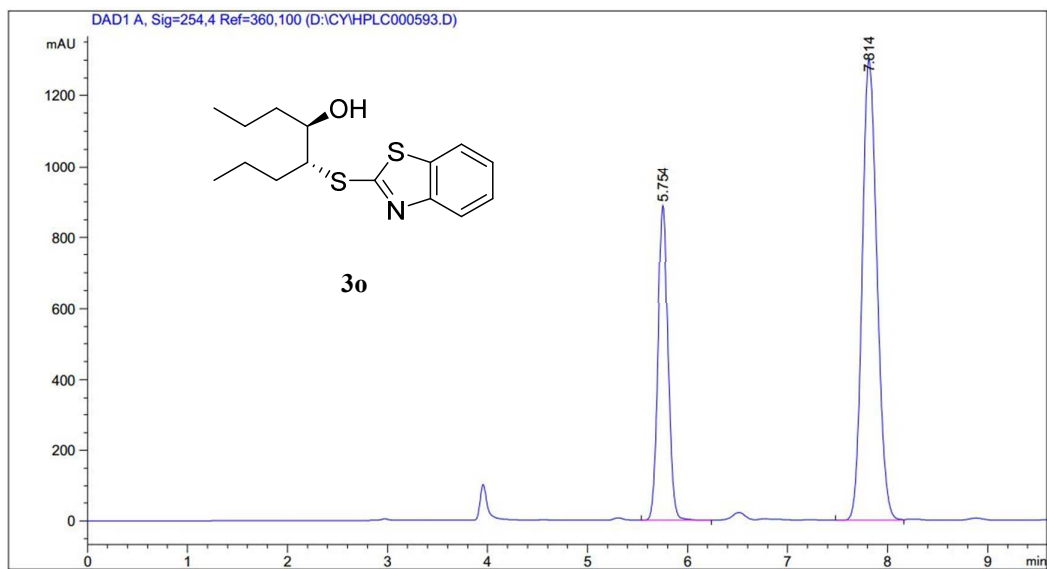

| Peak # | Ret. Time [min] | Type | Width [min] | Area [mAU*s] | Height [mAU] | Area %  |
|--------|-----------------|------|-------------|--------------|--------------|---------|
| 1      | 5.754           | VB   | 0.1085      | 6279.13574   | 887.65759    | 31.8761 |
| 2      | 7.814           | BV   | 0.1604      | 1.34194e4    | 1300.30701   | 68.1239 |

Figure S74. HPLC copies of compound **3o**

**Rac-3p, AD-H, iPrOH/Hex 10/90, flow rate = 1.0 mL/min**

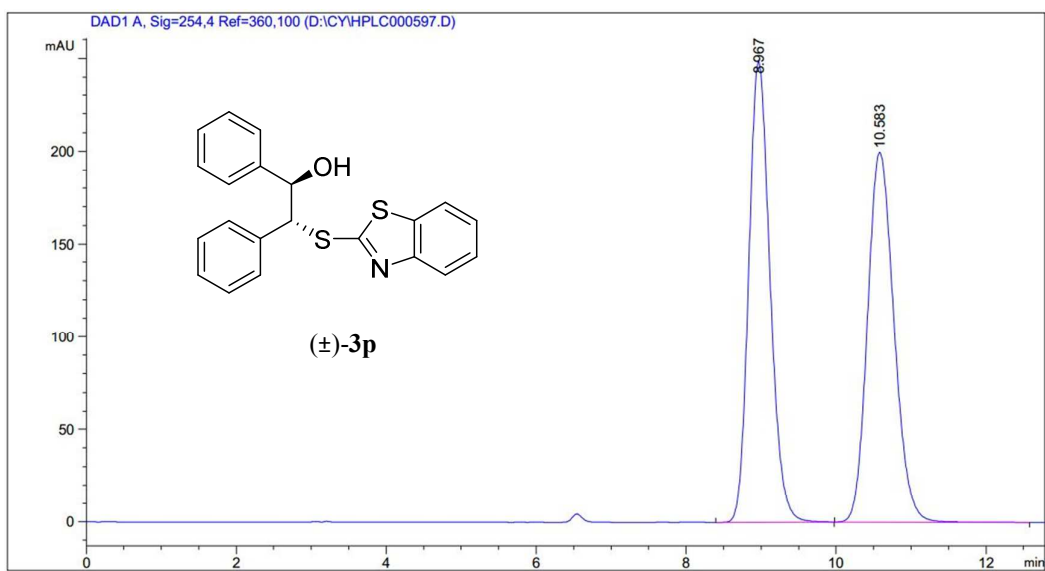

| Peak # | Ret. Time [min] | Type | Width [min] | Area [mAU*s] | Height [mAU] | Area %  |
|--------|-----------------|------|-------------|--------------|--------------|---------|
| 1      | 8.967           | BB   | 0.3035      | 4892.78857   | 248.77711    | 49.9768 |
| 2      | 10.583          | BB   | 0.3820      | 4897.33447   | 199.79153    | 50.0232 |

**Figure S75. HPLC copies of compound rac-3p**

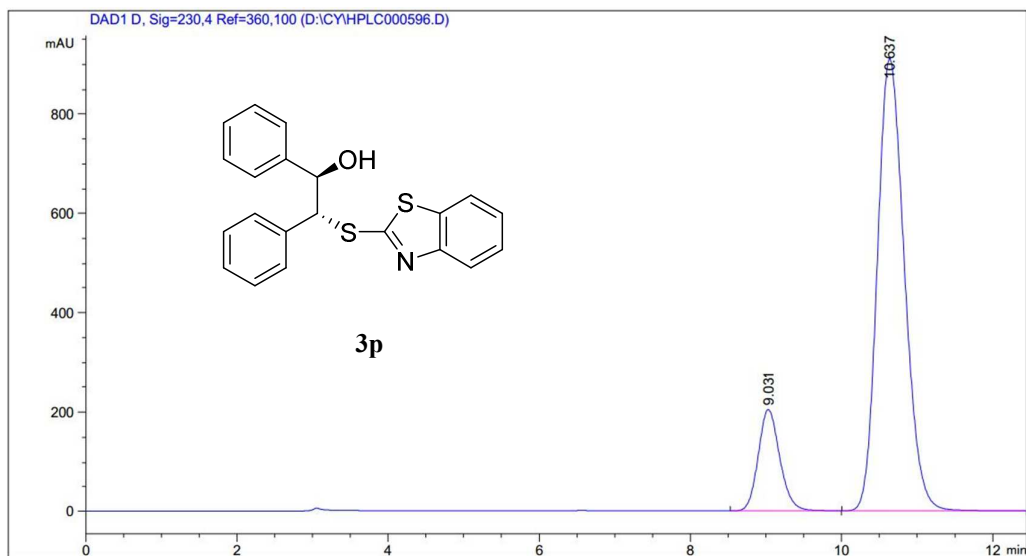

| Peak # | Ret. Time [min] | Type | Width [min] | Area [mAU*s] | Height [mAU] | Area %  |
|--------|-----------------|------|-------------|--------------|--------------|---------|
| 1      | 9.031           | BB   | 0.3081      | 4072.34521   | 204.67598    | 15.2393 |
| 2      | 10.637          | BBA  | 0.3878      | 2.26502e4    | 911.75610    | 84.7607 |

**Figure S76. HPLC copies of compound 3p**

AS-H, iPrOH/Hex 20/80, flow rate = 1.0 mL/min

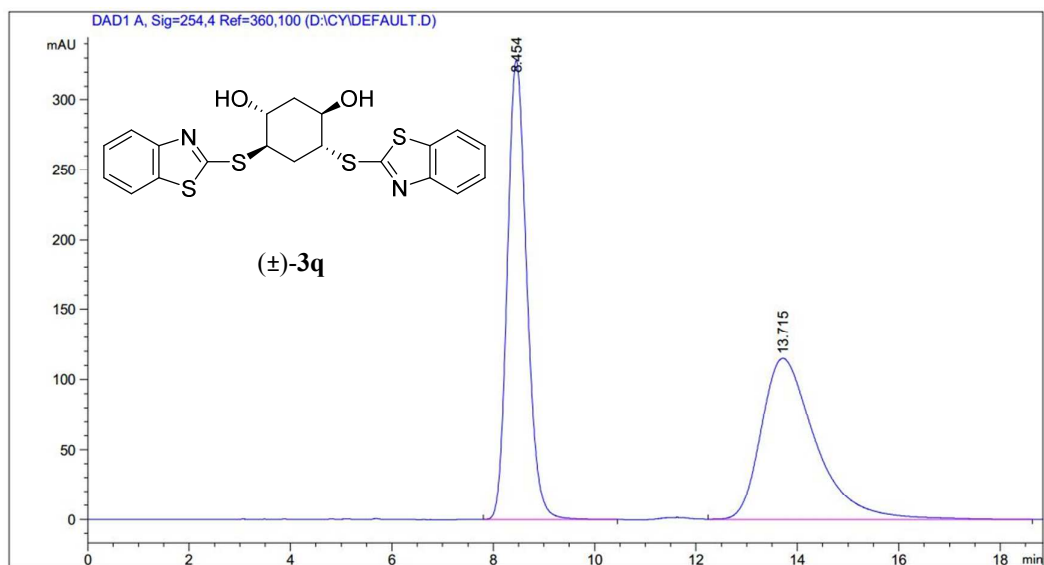

| Peak # | Ret. Time [min] | Type | Width [min] | Area [mAU*s] | Height [mAU] | Area %  |
|--------|-----------------|------|-------------|--------------|--------------|---------|
| 1      | 8.454           | BB   | 0.4125      | 8743.38184   | 328.47589    | 50.4028 |
| 2      | 13.715          | BB   | 1.1426      | 8603.64551   | 115.03646    | 49.5972 |

Figure S77. HPLC copies of compound rac-3q

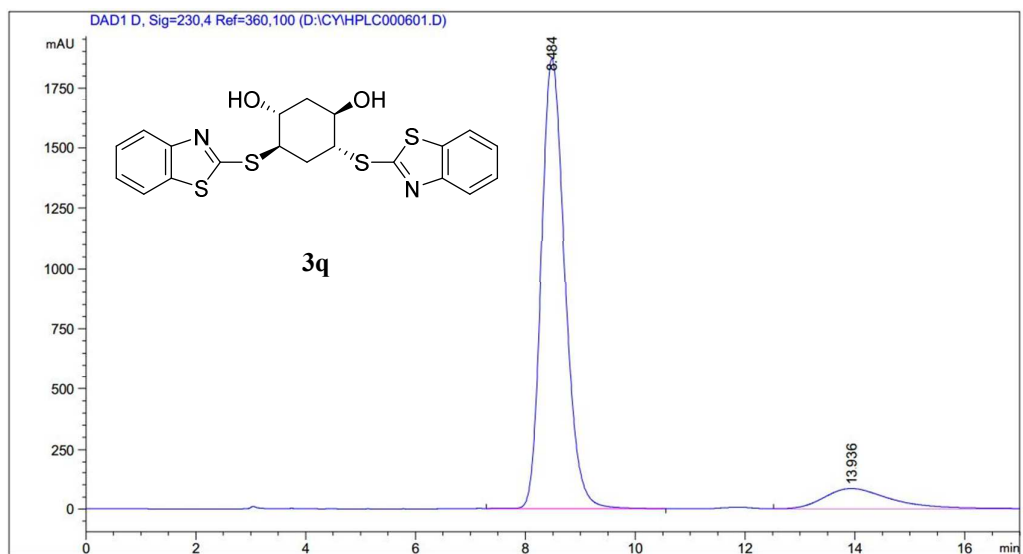

| Peak # | Ret. Time [min] | Type | Width [min] | Area [mAU*s] | Height [mAU] | Area %  |
|--------|-----------------|------|-------------|--------------|--------------|---------|
| 1      | 8.484           | BB   | 0.4610      | 5.55790e4    | 1868.42163   | 88.9140 |
| 2      | 13.936          | BBA  | 1.2688      | 6929.70996   | 83.28011     | 11.0860 |

Figure S78. HPLC copies of compound 3q
